# Supplementary material
Source: PubMed Central journal article supplement (PMC4073901)
Supplement: tableS1.pdf [file tableS1.pdf]

Supplementary Table S1. Gene ontology terms significantly enriched ( $P < 0.05$ ,  $FC > 2$ ) in the proximal small intestine (ANTI vs. CON). FDR, false discovery rate.

| #  | GO term    | Description                                                                                                               | Number in input list | Number in BG/Ref | p-value  | FDR      |
|----|------------|---------------------------------------------------------------------------------------------------------------------------|----------------------|------------------|----------|----------|
| 1  | GO:0034641 | cellular nitrogen compound metabolic process                                                                              | 32                   | 264              | 3.80E-09 | 8.10E-06 |
| 2  | GO:0010876 | lipid localization                                                                                                        | 7                    | 11               | 2.10E-08 | 2.30E-05 |
| 3  | GO:0002455 | humoral immune response mediated by circulating immunoglobulin                                                            | 9                    | 33               | 1.70E-06 | 0.00071  |
| 4  | GO:0002526 | acute inflammatory response                                                                                               | 13                   | 71               | 1.30E-06 | 0.00071  |
| 5  | GO:0006958 | complement activation, classical pathway                                                                                  | 9                    | 33               | 1.70E-06 | 0.00071  |
| 6  | GO:0070887 | cellular response to chemical stimulus                                                                                    | 16                   | 110              | 2.10E-06 | 0.00077  |
| 7  | GO:0045087 | innate immune response                                                                                                    | 13                   | 77               | 3.40E-06 | 0.001    |
| 8  | GO:0009605 | response to external stimulus                                                                                             | 37                   | 454              | 5.80E-06 | 0.0016   |
| 9  | GO:0006954 | inflammatory response                                                                                                     | 21                   | 193              | 7.70E-06 | 0.0018   |
| 10 | GO:0009611 | response to wounding                                                                                                      | 27                   | 294              | 1.10E-05 | 0.0024   |
| 11 | GO:0006956 | complement activation                                                                                                     | 9                    | 43               | 1.70E-05 | 0.0031   |
| 12 | GO:0002541 | activation of plasma proteins involved in acute inflammatory response                                                     | 9                    | 43               | 1.70E-05 | 0.0031   |
| 13 | GO:0006629 | lipid metabolic process                                                                                                   | 38                   | 501              | 2.20E-05 | 0.0036   |
| 14 | GO:0006952 | defense response                                                                                                          | 29                   | 342              | 2.50E-05 | 0.0038   |
| 15 | GO:0006631 | fatty acid metabolic process                                                                                              | 15                   | 128              | 5.90E-05 | 0.0084   |
| 16 | GO:0002253 | activation of immune response                                                                                             | 10                   | 62               | 6.50E-05 | 0.0088   |
| 17 | GO:0051605 | protein maturation by peptide bond cleavage                                                                               | 9                    | 52               | 8.50E-05 | 0.011    |
| 18 | GO:0019724 | B cell mediated immunity                                                                                                  | 9                    | 53               | 9.90E-05 | 0.011    |
| 19 | GO:0016064 | immunoglobulin mediated immune response                                                                                   | 9                    | 53               | 9.90E-05 | 0.011    |
| 20 | GO:0006959 | humoral immune response                                                                                                   | 9                    | 55               | 0.00013  | 0.014    |
| 21 | GO:0006805 | xenobiotic metabolic process                                                                                              | 8                    | 47               | 0.00023  | 0.022    |
| 22 | GO:0050778 | positive regulation of immune response                                                                                    | 10                   | 72               | 0.00024  | 0.022    |
| 23 | GO:0002682 | regulation of immune system process                                                                                       | 15                   | 145              | 0.00024  | 0.022    |
| 24 | GO:0002250 | adaptive immune response                                                                                                  | 9                    | 61               | 0.0003   | 0.026    |
| 25 | GO:0002460 | adaptive immune response based on somatic recombination of immune receptors built from immunoglobulin superfamily domains | 9                    | 61               | 0.0003   | 0.026    |
| 26 | GO:0050776 | regulation of immune response                                                                                             | 11                   | 89               | 0.00033  | 0.027    |
| 27 | GO:0002449 | lymphocyte mediated immunity                                                                                              | 9                    | 62               | 0.00034  | 0.027    |
| 28 | GO:0009410 | response to xenobiotic stimulus                                                                                           | 8                    | 51               | 0.00042  | 0.031    |
| 29 | GO:0032787 | monocarboxylic acid metabolic process                                                                                     | 21                   | 255              | 0.00041  | 0.031    |
| 30 | GO:0002443 | leukocyte mediated immunity                                                                                               | 9                    | 65               | 0.00048  | 0.035    |
| 31 | GO:0006950 | response to stress                                                                                                        | 52                   | 881              | 0.00054  | 0.038    |
| 32 | GO:0033559 | unsaturated fatty acid metabolic process                                                                                  | 6                    | 31               | 0.00069  | 0.046    |
| 33 | GO:0004497 | monooxygenase activity                                                                                                    | 11                   | 45               | 4.00E-07 | 0.00019  |
| 34 | GO:0046906 | tetrapyrrole binding                                                                                                      | 14                   | 91               | 4.50E-06 | 0.0011   |
| 35 | GO:0016705 | oxidoreductase activity, acting on paired donors, with incorporation or reduction of molecular oxygen                     | 11                   | 61               | 9.70E-06 | 0.0015   |
| 36 | GO:0020037 | heme binding                                                                                                              | 12                   | 86               | 5.60E-05 | 0.0065   |
| 37 | GO:0016627 | oxidoreductase activity, acting on the CH-CH group of donors                                                              | 8                    | 40               | 7.10E-05 | 0.0066   |
| 38 | GO:0003995 | acyl-CoA dehydrogenase activity                                                                                           | 5                    | 15               | 0.00013  | 0.0083   |
| 39 | GO:0016491 | oxidoreductase activity                                                                                                   | 33                   | 448              | 0.00012  | 0.0083   |
| 40 | GO:0016853 | isomerase activity                                                                                                        | 11                   | 83               | 0.00018  | 0.01     |
