# Supplementary material
Source: PubMed Central journal article supplement (PMC4073901)
Supplement: tableS2.pdf [file tableS2.pdf]

Supplementary Table S2. Gene ontology terms significantly enriched ( $P < 0.05$ ,  $FC > 2$ ) in the distal small intestine (ANTI vs. CON). FDR, false discovery rate.

| #  | GO term    | Description                                                                                                               | Number in input list | Number in BG/Ref | p-value  | FDR      |
|----|------------|---------------------------------------------------------------------------------------------------------------------------|----------------------|------------------|----------|----------|
| 1  | GO:0006954 | inflammatory response                                                                                                     | 37                   | 193              | 3.80E-13 | 5.50E-10 |
| 2  | GO:0006955 | immune response                                                                                                           | 49                   | 312              | 2.70E-13 | 5.50E-10 |
| 3  | GO:0002455 | humoral immune response mediated by circulating immunoglobulin                                                            | 15                   | 33               | 4.70E-12 | 2.70E-09 |
| 4  | GO:0002376 | immune system process                                                                                                     | 61                   | 474              | 3.70E-12 | 2.70E-09 |
| 5  | GO:0006958 | complement activation, classical pathway                                                                                  | 15                   | 33               | 4.70E-12 | 2.70E-09 |
| 6  | GO:0002526 | acute inflammatory response                                                                                               | 21                   | 71               | 6.30E-12 | 3.00E-09 |
| 7  | GO:0006952 | defense response                                                                                                          | 49                   | 342              | 8.10E-12 | 3.30E-09 |
| 8  | GO:0009611 | response to wounding                                                                                                      | 44                   | 294              | 1.90E-11 | 6.90E-09 |
| 9  | GO:0006959 | humoral immune response                                                                                                   | 18                   | 55               | 2.90E-11 | 9.20E-09 |
| 10 | GO:0002541 | activation of plasma proteins involved in acute inflammatory response                                                     | 16                   | 43               | 3.80E-11 | 9.90E-09 |
| 11 | GO:0006956 | complement activation                                                                                                     | 16                   | 43               | 3.80E-11 | 9.90E-09 |
| 12 | GO:0010876 | lipid localization                                                                                                        | 9                    | 11               | 4.80E-11 | 1.20E-08 |
| 13 | GO:0051605 | protein maturation by peptide bond cleavage                                                                               | 17                   | 52               | 1.00E-10 | 2.30E-08 |
| 14 | GO:0016064 | immunoglobulin mediated immune response                                                                                   | 17                   | 53               | 1.40E-10 | 2.80E-08 |
| 15 | GO:0019724 | B cell mediated immunity                                                                                                  | 17                   | 53               | 1.40E-10 | 2.80E-08 |
| 16 | GO:0002253 | activation of immune response                                                                                             | 18                   | 62               | 2.70E-10 | 4.80E-08 |
| 17 | GO:0002460 | adaptive immune response based on somatic recombination of immune receptors built from immunoglobulin superfamily domains | 17                   | 61               | 1.70E-09 | 2.70E-07 |
| 18 | GO:0002250 | adaptive immune response                                                                                                  | 17                   | 61               | 1.70E-09 | 2.70E-07 |
| 19 | GO:0045087 | innate immune response                                                                                                    | 19                   | 77               | 1.80E-09 | 2.80E-07 |
| 20 | GO:0002449 | lymphocyte mediated immunity                                                                                              | 17                   | 62               | 2.20E-09 | 3.10E-07 |
| 21 | GO:0050778 | positive regulation of immune response                                                                                    | 18                   | 72               | 3.80E-09 | 5.20E-07 |
| 22 | GO:0002443 | leukocyte mediated immunity                                                                                               | 17                   | 65               | 4.80E-09 | 6.30E-07 |
| 23 | GO:0009605 | response to external stimulus                                                                                             | 52                   | 454              | 6.00E-09 | 7.30E-07 |
| 24 | GO:0016485 | protein processing                                                                                                        | 18                   | 74               | 6.10E-09 | 7.30E-07 |
| 25 | GO:0002684 | positive regulation of immune system process                                                                              | 21                   | 101              | 7.50E-09 | 8.60E-07 |
| 26 | GO:0051604 | protein maturation                                                                                                        | 18                   | 76               | 9.60E-09 | 1.10E-06 |
| 27 | GO:0002682 | regulation of immune system process                                                                                       | 25                   | 145              | 1.70E-08 | 1.90E-06 |
| 28 | GO:0050776 | regulation of immune response                                                                                             | 19                   | 89               | 2.40E-08 | 2.40E-06 |
| 29 | GO:0048584 | positive regulation of response to stimulus                                                                               | 20                   | 105              | 7.70E-08 | 7.70E-06 |
| 30 | GO:0002252 | immune effector process                                                                                                   | 18                   | 93               | 2.60E-07 | 2.50E-05 |
| 31 | GO:0048583 | regulation of response to stimulus                                                                                        | 24                   | 183              | 5.20E-06 | 0.00049  |
| 32 | GO:0050896 | response to stimulus                                                                                                      | 105                  | 1444             | 1.70E-05 | 0.0015   |
| 33 | GO:0006957 | complement activation, alternative pathway                                                                                | 5                    | 10               | 4.30E-05 | 0.0037   |
| 34 | GO:0019882 | antigen processing and presentation                                                                                       | 12                   | 66               | 4.50E-05 | 0.0038   |
| 35 | GO:0034641 | cellular nitrogen compound metabolic process                                                                              | 28                   | 264              | 5.10E-05 | 0.0042   |
| 36 | GO:0006950 | response to stress                                                                                                        | 68                   | 881              | 6.40E-05 | 0.0052   |
| 37 | GO:0006508 | proteolysis                                                                                                               | 36                   | 401              | 0.00017  | 0.013    |
| 38 | GO:0006935 | chemotaxis                                                                                                                | 11                   | 68               | 0.00027  | 0.02     |
| 39 | GO:0042330 | taxis                                                                                                                     | 11                   | 68               | 0.00027  | 0.02     |
| 40 | GO:0019835 | cytolysis                                                                                                                 | 5                    | 16               | 0.00059  | 0.042    |
