# Supplementary material
Source: PubMed Central journal article supplement (PMC4073901)
Supplement: tableS3.pdf [file tableS3.pdf]

Table S3. Microarray data submitted to the National Center for Biotechnology Information (NCBI)

Gene Expression Omnibus (accession number GSE48125; <http://www.ncbi.nlm.nih.gov/geo>).

Differentially expressed genes ( $P < 0.01$ ,  $FC > 2$ ) in the proximal small intestine (ANTI vs. CON).

| ID                  | FC    | P.Value  | Gene Symbol | Gene Title                                                           |
|---------------------|-------|----------|-------------|----------------------------------------------------------------------|
| Ssc.3381.1.S1_a_at  | 63.44 | 0.000261 | APOC4       | Apolipoprotein C-II precursor (Apo-CII)                              |
| Ssc.26321.1.S1_at   | 19.95 | 0.00049  | CYP2C18     | Cytochrome P450 2C18                                                 |
| Ssc.204.1.S1_at     | 16.26 | 0.003847 | CYP3A4      | Cytochrome P450 3A4                                                  |
| Ssc.14073.2.S1_at   | 15.03 | 0.006599 | HSD17B2     | Estradiol 17-beta-dehydrogenase 2                                    |
| Ssc.14073.1.S1_at   | 10.63 | 0.004893 | HSD17B2     | Estradiol 17-beta-dehydrogenase 2                                    |
| Ssc.26321.1.A1_s_at | 10.10 | 0.000454 | CYP2C18     | Cytochrome P450 2C18                                                 |
| Ssc.21194.1.S1_at   | 9.17  | 0.001923 | PTPRR       | Receptor-type protein-tyrosine phosphatase R precursor               |
| Ssc.4856.1.A1_at    | 7.98  | 0.002781 | TAF3        | TAFII140 protein (Fragment)                                          |
| Ssc.15379.1.S1_at   | 6.88  | 0.005768 | DGAT2       | diacylglycerol O-acyltransferase homolog 2 [Homo sapiens]            |
| Ssc.15466.1.S1_at   | 6.85  | 0.004108 | RRAGD       | Ras-related GTP binding D [Homo sapiens]                             |
| Ssc.5127.1.S1_at    | 6.65  | 0.003639 | FBP1        | Fructose-1,6-bisphosphatase                                          |
| Ssc.6106.2.S1_at    | 6.23  | 0.006716 | PTPRD       | Protein-tyrosine phosphatase delta precursor                         |
| Ssc.16261.1.S1_at   | 6.03  | 0.005474 | CYP2C18     | Cytochrome P450 2C18                                                 |
| Ssc.6106.1.S1_at    | 5.62  | 0.009692 | PTPRD       | Protein-tyrosine phosphatase delta precursor                         |
| Ssc.20570.1.S1_at   | 5.58  | 0.005889 | ACAD11      | nephrocystin 3 [Homo sapiens]                                        |
| Ssc.15893.1.S1_at   | 5.43  | 0.001997 | SLN         | sarcophilin (SLN), mRNA                                              |
| Ssc.15397.1.S1_at   | 5.29  | 0.000378 | LMCD1       | LIM and cysteine-rich domains protein 1                              |
| Ssc.8516.1.A1_at    | 5.20  | 0.008113 | GSTA1       | Glutathione S-transferase A1                                         |
| Ssc.203.1.S1_at     | 4.89  | 0.005567 | CYP3A7      | Cytochrome P450 3A7                                                  |
| Ssc.18486.1.S1_a_at | 4.89  | 0.000442 | H1FO        | Histone H1.0 (H1(0))                                                 |
| Ssc.19323.1.S1_at   | 4.84  | 8.43E-05 | FAM114A1    |                                                                      |
| Ssc.16155.1.S1_at   | 4.81  | 0.006469 | OTC         | Ornithine carbamoyltransferase, mitochondrial precursor              |
| Ssc.25636.1.S1_at   | 4.78  | 0.00124  | ENPP5       |                                                                      |
| Ssc.5405.1.A1_at    | 4.69  | 0.000896 | SETD8       | Histone-lysine N-methyltransferase, H4 lysine-20 specific            |
| Ssc.4715.1.S1_at    | 4.61  | 0.000644 | TM7SF2      | Delta(14)-sterol reductase                                           |
| Ssc.2896.1.S1_at    | 4.58  | 0.004615 | TRPV6       | transient receptor potential cation channel, subfamily V, member 6   |
| Ssc.26755.1.A1_at   | 4.50  | 0.002463 | 0           | 125 kDa protein                                                      |
| Ssc.27521.1.S1_at   | 4.47  | 0.000937 | ABCD4       | ATP-binding cassette, sub-family D, member 4                         |
| Ssc.4665.1.S1_at    | 4.43  | 0.000214 | THNSL2      |                                                                      |
| Ssc.8278.1.S1_at    | 4.38  | 0.003575 | EPHX2       | Soluble epoxide hydrolase                                            |
| Ssc.836.1.S1_at     | 4.37  | 0.002395 | LDHD        | D-lactate dehydrogenase isoform I precursor                          |
| Ssc.25819.1.S1_at   | 4.24  | 0.00349  | 0           |                                                                      |
| Ssc.5327.2.A1_at    | 4.13  | 0.001017 | CYP2J2      | Cytochrome P450 2J2                                                  |
| Ssc.24194.1.S1_a_at | 4.11  | 0.002297 | TCEA2       | Transcription elongation factor A protein 2                          |
| Ssc.18608.1.S1_at   | 4.05  | 0.005648 | RBP5        | Retinol-binding protein III, cellular                                |
| Ssc.2825.1.S1_at    | 4.02  | 0.001265 | GSTA1       | Glutathione S-transferase A1                                         |
| Ssc.1856.1.A1_at    | 3.84  | 0.001668 | ACAA2       | 3-ketoacyl-CoA thiolase, mitochondrial                               |
| Ssc.86.1.S1_at      | 3.84  | 1.27E-05 | DHRS4       | Dehydrogenase/reductase SDR family member 4                          |
| Ssc.13744.1.A1_at   | 3.79  | 0.007978 | ATP6V0D1    | Vacuolar ATP synthase subunit d                                      |
| Ssc.19659.2.S1_at   | 3.67  | 0.00053  | LPCAT3      | gene rich cluster, C3f gene [Homo sapiens]                           |
| Ssc.1847.1.S1_at    | 3.58  | 0.000295 | MYBPC3      | Myosin-binding protein C, cardiac-type                               |
| Ssc.21948.1.S1_at   | 3.48  | 0.000659 | QPRT        | Nicotinate-nucleotide pyrophosphorylase [carboxylating]              |
| Ssc.19541.1.A1_at   | 3.46  | 0.001941 | MTMR8       | myotubularin related protein 8 [Homo sapiens]                        |
| Ssc.20303.1.S1_at   | 3.43  | 0.007636 | PMM1        | Phosphomannomutase 1                                                 |
| Ssc.30664.1.S1_at   | 3.43  | 0.006781 | ERC2        | ERC protein 2                                                        |
| Ssc.9392.2.S1_at    | 3.43  | 0.000141 | EGF         | Pro-epidermal growth factor precursor                                |
| Ssc.17264.1.S1_at   | 3.41  | 3.46E-05 | SLC25A1     | Tricarboxylate transport protein, mitochondrial precursor            |
| Ssc.14322.1.A1_at   | 3.40  | 0.002392 | C7orf10     |                                                                      |
| Ssc.28450.1.S1_at   | 3.37  | 0.007375 | MFS2        |                                                                      |
| Ssc.10442.2.S1_a_at | 3.37  | 0.000483 | APOH        | Beta-2-glycoprotein I precursor                                      |
| Ssc.1652.1.S1_at    | 3.35  | 0.008823 | GCAT        | 2-amino-3-ketobutyrate coenzyme A ligase, mitochondrial precursor    |
| Ssc.3029.1.A1_at    | 3.34  | 0.004447 | CRYZ        | Quinone oxidoreductase                                               |
| Ssc.1018.1.S1_at    | 3.34  | 0.003387 | CAT         | Catalase                                                             |
| Ssc.7769.1.S1_at    | 3.22  | 0.000406 | LPGAT1      | Protein FAM34A                                                       |
| Ssc.1006.1.S1_at    | 3.16  | 0.000517 | PGM1        | Phosphoglucomutase                                                   |
| Ssc.20196.1.A1_at   | 3.15  | 0.000416 | COQ6        | Ubiquinone biosynthesis monooxygenase COQ6                           |
| Ssc.1511.1.S1_a_at  | 3.12  | 0.003189 | AGMAT       | Agmatinase, mitochondrial precursor                                  |
| Ssc.16716.1.S1_at   | 3.11  | 0.00817  | PGF         | Placenta growth factor precursor                                     |
| Ssc.14530.1.S1_at   | 3.11  | 0.003453 | ACADL       | Acyl-CoA dehydrogenase, long-chain specific, mitochondrial precursor |

|                     |      |          |           |                                                                        |
|---------------------|------|----------|-----------|------------------------------------------------------------------------|
| Ssc.7769.2.S1_at    | 3.11 | 0.002219 | LPGAT1    | Protein FAM34A                                                         |
| Ssc.24502.1.A1_at   | 3.09 | 0.008278 | C9orf95   | Nicotinamide riboside kinase 1                                         |
| Ssc.18486.2.S1_at   | 3.09 | 0.000204 | H1FO      | Histone H1.0                                                           |
| Ssc.16391.1.A1_at   | 3.08 | 0.000218 | GAS2      | Growth-arrest-specific protein 2                                       |
| Ssc.15316.2.S1_at   | 3.05 | 0.004833 | CRIP1     | Cysteine-rich protein 1                                                |
| Ssc.8524.1.A1_at    | 3.05 | 0.004525 | C17orf79  |                                                                        |
| Ssc.7054.2.A1_at    | 2.99 | 0.004085 | RPL10A    | ribosomal protein L10a [Homo sapiens]                                  |
| Ssc.24325.1.S1_at   | 2.98 | 0.006737 | PBLD      | MAWD binding protein                                                   |
| Ssc.24461.1.S1_a_at | 2.98 | 0.004039 | HAAO      | 3-hydroxyanthranilate 3,4-dioxygenase                                  |
| Ssc.15304.1.S1_at   | 2.96 | 0.000957 | HYI       |                                                                        |
| Ssc.30173.1.A1_at   | 2.95 | 0.001711 | PAPPA2    | pappalysin 2 isoform 1 [Homo sapiens]                                  |
| Ssc.23758.2.A1_at   | 2.94 | 0.005462 | SLC46A3   |                                                                        |
| Ssc.29178.1.A1_at   | 2.94 | 0.000597 | TGOLN2    | Trans-Golgi network integral membrane protein 2 precursor              |
| Ssc.11252.1.S1_at   | 2.93 | 0.001404 | SPR       | Sepiapterin reductase                                                  |
| Ssc.8088.1.A1_s_at  | 2.93 | 0.001243 | CNTNAP2   |                                                                        |
| Ssc.14114.1.A1_at   | 2.92 | 0.00377  | ABCD3     | ATP-binding cassette, sub-family D, member 3                           |
| Ssc.25198.1.A1_at   | 2.89 | 0.008027 | OAT       | Ornithine aminotransferase, mitochondrial precursor                    |
| Ssc.776.1.S1_a_at   | 2.89 | 0.007411 | PEPD      | Xaa-Pro dipeptidase                                                    |
| Ssc.2306.1.S1_at    | 2.89 | 0.000963 | HEBP1     | heme binding protein 1 [Homo sapiens]                                  |
| Ssc.15591.1.S1_at   | 2.89 | 0.000961 | FIGNL1    | fidgetin-like 1 [Homo sapiens]                                         |
| Ssc.23305.1.S1_at   | 2.86 | 0.00971  | TMEM144   |                                                                        |
| Ssc.27270.1.S1_at   | 2.83 | 0.005544 | ABHD5     | CGI58 protein; comparative gene identification 58 [Homo sapiens]       |
| Ssc.9392.3.A1_at    | 2.79 | 0.000632 | EGF       | Pro-epidermal growth factor precursor                                  |
| Ssc.24182.1.S1_at   | 2.78 | 7.05E-05 | TMEM135   |                                                                        |
| Ssc.7054.1.A1_at    | 2.76 | 0.005293 | RPL10A    | ribosomal protein L10a [Homo sapiens]                                  |
| Ssc.18098.3.A1_at   | 2.75 | 0.001071 | XYLB      | xylokinae homolog [Homo sapiens]                                       |
| Ssc.24461.1.S1_at   | 2.74 | 0.008819 | HAAO      | 3-hydroxyanthranilate 3,4-dioxygenase                                  |
| Ssc.6145.1.A1_at    | 2.64 | 0.00835  | CYBRD1    | cytochrome b reductase 1 [Homo sapiens]                                |
| Ssc.9679.2.S1_at    | 2.63 | 0.002077 | LIPA      | Lysosomal acid lipase/cholesteryl ester hydrolase precursor            |
| Ssc.16225.1.S1_at   | 2.62 | 0.004273 | GHR       | Growth hormone receptor precursor                                      |
| Ssc.14490.1.S1_at   | 2.62 | 0.003775 | PTGR1     | NADP-dependent leukotriene B4 12-hydroxydehydrogenase                  |
| Ssc.15622.1.S1_at   | 2.62 | 0.001312 | Q9NW15    |                                                                        |
| Ssc.4457.2.S1_at    | 2.58 | 0.000298 | C9orf80   |                                                                        |
| Ssc.4625.2.S1_at    | 2.55 | 0.003026 | C12orf49  |                                                                        |
| Ssc.18280.1.A1_at   | 2.53 | 0.007049 | C1QTNF3   | Alpha-methylacyl-CoA racemase                                          |
| Ssc.64.1.S1_at      | 2.51 | 0.001745 | ABCG2     | ATP-binding cassette, sub-family G, member 2                           |
| Ssc.24652.1.S1_at   | 2.50 | 0.002137 | PAK1      | Serine/threonine-protein kinase PAK 1                                  |
| Ssc.2710.1.S1_at    | 2.49 | 0.008956 | VPS28     | VPS28 protein homolog                                                  |
| Ssc.19659.1.S1_at   | 2.49 | 0.008877 | LPCAT3    | gene rich cluster, C3f gene [Homo sapiens]                             |
| Ssc.22078.1.A1_at   | 2.49 | 0.004407 | PLA2G10   | Group X secretory phospholipase A2 precursor                           |
| Ssc.16111.2.S1_at   | 2.47 | 0.002093 | PMVK      | Phosphomevalonate kinase                                               |
| Ssc.2551.1.A1_at    | 2.47 | 0.001451 | RAB31     | Ras-related protein Rab-31                                             |
| Ssc.189.1.S1_at     | 2.45 | 0.006176 | DGAT1     | Diacylglycerol O-acyltransferase 1                                     |
| Ssc.1465.1.S1_at    | 2.45 | 0.000616 | DECR1     | 2,4-dienoyl-CoA reductase, mitochondrial precursor                     |
| Ssc.19562.1.S1_at   | 2.44 | 0.000137 | GSTZ1     | Maleylacetoacetate isomerase                                           |
| Ssc.26273.1.S1_at   | 2.43 | 0.00913  | BLVRA     | Biliverdin reductase A precursor                                       |
| Ssc.28013.1.A1_at   | 2.42 | 0.002838 | VKORC1L1  | vitamin K epoxide reductase complex, subunit 1-like 1 [Homo sapiens]   |
| Ssc.31168.1.S1_at   | 2.40 | 0.004544 | NIPSNAP1  | NipSnap1 protein                                                       |
| Ssc.11816.1.A1_at   | 2.32 | 0.001252 | ABCD3     | ATP-binding cassette, sub-family D, member 3                           |
| Ssc.9679.1.A1_at    | 2.30 | 0.000374 | LIPA      | Lysosomal acid lipase/cholesteryl ester hydrolase precursor            |
| Ssc.8203.1.S1_at    | 2.29 | 0.005111 | EPHX1     | Epoxide hydrolase 1                                                    |
| Ssc.25218.2.S1_at   | 2.29 | 0.003169 | IVD       | Isovaleryl-CoA dehydrogenase, mitochondrial precursor                  |
| Ssc.958.1.S1_at     | 2.27 | 0.009271 | ALDOB     | Fructose-bisphosphate aldolase B                                       |
| Ssc.24184.1.S1_at   | 2.26 | 0.000163 | GPD1L     | glycerol-3-phosphate dehydrogenase 1-like [Homo sapiens]               |
| Ssc.11043.1.A1_at   | 2.25 | 0.002597 | TEX2      | uncharacterized hypothalamus protein HT008 [Homo sapiens]              |
| Ssc.24238.1.S1_s_at | 2.24 | 0.005423 | RECQL5    | ATP-dependent DNA helicase Q5                                          |
| Ssc.4523.1.S1_at    | 2.22 | 0.006836 | CROT      | Peroxisomal carnitine O-octanoyltransferase                            |
| Ssc.1762.2.A1_at    | 2.22 | 0.005403 | PLA2G10   | Group X secretory phospholipase A2 precursor                           |
| Ssc.4903.1.A1_at    | 2.21 | 0.00463  | CCDC115   |                                                                        |
| Ssc.9819.1.S1_at    | 2.21 | 0.000555 | PGRMC1    | Membrane associated progesterone receptor component 1                  |
| Ssc.3021.1.A1_at    | 2.20 | 2.32E-05 | ENOX2     | Tumor-associated hydroquinone oxidase                                  |
| Ssc.11422.1.A1_at   | 2.19 | 0.00722  | PLA1A     | phospholipase A1 member A [Homo sapiens]                               |
| Ssc.14190.1.A1_at   | 2.18 | 0.009948 | KLHL1     | Kelch-like protein 1                                                   |
| Ssc.14218.1.S1_at   | 2.18 | 0.005171 | SPG21     | acid cluster protein 33 [Homo sapiens]                                 |
| Ssc.4497.1.A1_at    | 2.17 | 0.002355 | MFSD11    |                                                                        |
| Ssc.15598.1.S1_at   | 2.17 | 0.000875 | INSIG1    | Insulin-induced protein 1                                              |
| Ssc.11816.2.A1_a_at | 2.16 | 0.00838  | ABCD3     | ATP-binding cassette, sub-family D, member 3                           |
| Ssc.20939.1.S1_at   | 2.16 | 0.007728 | C20orf149 |                                                                        |
| Ssc.1239.1.A1_at    | 2.14 | 0.005986 | NDUFA9    | NADH-ubiquinone oxidoreductase 39 kDa subunit, mitochondrial precursor |

|                     |       |          |          |                                                                                                       |
|---------------------|-------|----------|----------|-------------------------------------------------------------------------------------------------------|
| Ssc.12198.1.A1_at   | 2.13  | 0.001159 | CYB5A    | Cytochrome b5                                                                                         |
| Ssc.23782.2.S1_at   | 2.12  | 0.006892 | PURA     | Transcriptional activator protein PUR-alpha                                                           |
| Ssc.10819.1.S1_at   | 2.12  | 0.004158 | NIT2     | nitrilase family, member 2 [Homo sapiens]                                                             |
| Ssc.14188.1.A1_at   | 2.12  | 0.003866 | LPGAT1   | Protein FAM34A                                                                                        |
| Ssc.83.1.S1_at      | 2.11  | 0.005018 | ENPEP    | Glutamyl aminopeptidase                                                                               |
| Ssc.10926.1.A1_at   | 2.11  | 0.001739 | SLC35F5  | solute carrier family 35, member F5 [Homo sapiens]                                                    |
| Ssc.27882.1.A1_at   | 2.10  | 0.005887 | TCEAL4   | transcription elongation factor A (SII)-like 4                                                        |
| Ssc.24762.1.A1_at   | 2.10  | 0.004584 | OSBPL1A  | Oxysterol binding protein-related protein 1                                                           |
| Ssc.27099.1.A1_at   | 2.09  | 0.008545 | SEC22C   | vesicle trafficking protein isoform b [Homo sapiens]                                                  |
| Ssc.11666.1.S1_s_at | 2.06  | 0.008661 | C9orf142 |                                                                                                       |
| Ssc.7292.1.S1_at    | 2.05  | 0.005356 | FANCC    | Fanconi anemia group C protein (FACC protein)                                                         |
| Ssc.17674.1.A1_at   | 2.04  | 0.00849  | DNM3     | Dynamin 3                                                                                             |
| Ssc.7204.1.A1_at    | 2.03  | 0.008874 | HAGH     | Hydroxyacylglutathione hydrolase                                                                      |
| Ssc.22476.1.A1_at   | 2.02  | 0.003622 | TXNDC16  | KIAA1344                                                                                              |
| Ssc.11580.1.S1_at   | 2.01  | 0.003744 | HADHA    | Trifunctional enzyme alpha subunit, mitochondrial precursor                                           |
| Ssc.8663.1.A1_at    | 2.01  | 0.002632 | PGRMC2   | Membrane associated progesterone receptor component 2                                                 |
| Ssc.9332.1.A1_at    | 2.01  | 0.000167 | MID2     | Midline 2 protein                                                                                     |
| Ssc.15926.1.S1_at   | -2.00 | 0.004435 | CLCA1    | calcium activated chloride channel 1 precursor [Homo sapiens]                                         |
| Ssc.10859.1.S1_at   | -2.02 | 0.008096 | CSR2     | Cysteine and glycine-rich protein 2                                                                   |
| Ssc.26435.1.A1_at   | -2.02 | 0.003749 | KV5A     | Ig kappa chain V region EV15 precursor                                                                |
| Ssc.18022.2.S1_at   | -2.03 | 0.009717 | SLC33A1  | acetyl-coenzyme A transporter [Homo sapiens]                                                          |
| Ssc.20937.1.S1_at   | -2.04 | 0.006235 | TBC1D2B  |                                                                                                       |
| Ssc.22606.1.A1_at   | -2.04 | 0.001948 | ANAPC1   | Anaphase promoting complex subunit 1                                                                  |
| Ssc.4177.1.A1_at    | -2.07 | 0.000381 | WASF3    | Wiskott-Aldrich syndrome protein family member 3                                                      |
| Ssc.12013.1.A1_at   | -2.08 | 0.004332 | SYTL4    | Synaptotagmin-like protein 4                                                                          |
| Ssc.30967.1.A1_at   | -2.09 | 0.009363 | CRISPLD2 |                                                                                                       |
| Ssc.7789.1.A1_at    | -2.11 | 0.009942 | ZNF143   | Zinc finger protein 143                                                                               |
| Ssc.28902.1.S1_at   | -2.11 | 0.008718 | NUP153   | Nuclear pore complex protein Nup153                                                                   |
| Ssc.5893.1.S1_at    | -2.11 | 0.004968 | DOCK7    | Dedicator of cytokinesis protein 7 (Fragment)                                                         |
| Ssc.21581.1.S1_at   | -2.11 | 0.001891 | ARID5B   |                                                                                                       |
| Ssc.19350.1.S1_at   | -2.11 | 0.000836 | IER5     | immediate early response 5 [Homo sapiens]                                                             |
| Ssc.6592.2.S1_at    | -2.12 | 0.005039 | PAN2     | ubiquitin specific protease 52 [Homo sapiens]                                                         |
| Ssc.13537.1.A1_at   | -2.14 | 0.009424 | PRKAB2   | 5-AMP-activated protein kinase, beta-2 subunit                                                        |
| Ssc.1549.1.A1_at    | -2.14 | 0.008923 | STIP1    | Stress-induced-phosphoprotein 1                                                                       |
| Ssc.5832.1.S1_at    | -2.19 | 0.00808  | JARID2   | Jumonji protein (Jumonji/ARID domain-containing protein 2)                                            |
| Ssc.22090.1.A1_at   | -2.19 | 0.007803 | HS3ST1   | heparan sulfate D-glucosaminyl 3-O-sulfotransferase 1 precursor [Homo sapiens]                        |
| Ssc.22157.1.A1_at   | -2.21 | 0.002533 | PHLPP    | suprachiasmatic nucleus circadian oscillatory protein [Homo sapiens]                                  |
| Ssc.6384.1.S1_at    | -2.24 | 0.004382 | RGS4     | Regulator of G-protein signaling 4                                                                    |
| Ssc.11162.1.S1_at   | -2.25 | 0.008888 | C4BPA    | C4b-binding protein alpha chain precursor                                                             |
| Ssc.27075.1.A1_at   | -2.25 | 0.004594 | CDC27    | Cell division cycle protein 27 homolog                                                                |
| Ssc.18217.1.S1_at   | -2.29 | 0.004576 | RSPO3    | thrombospondin, type I, domain containing 2 [Homo sapiens]                                            |
| Ssc.27175.1.A1_at   | -2.30 | 0.002626 | MYO5C    | Myosin Vc                                                                                             |
| Ssc.13611.1.A1_at   | -2.32 | 0.007454 | NT5DC1   | 5-nucleotidase, cytosolic II-like 1 protein [Homo sapiens]                                            |
| Ssc.17920.1.A1_at   | -2.33 | 0.007776 | C15orf17 |                                                                                                       |
| Ssc.6139.1.S1_a_at  | -2.34 | 0.008928 | WARS     | Tryptophanyl-tRNA synthetase                                                                          |
| Ssc.24009.1.S1_at   | -2.34 | 0.00477  | NT5C     | 5(3)-deoxyribonucleotidase, cytosolic type                                                            |
| Ssc.23048.1.S1_at   | -2.34 | 0.001093 | KIAA0408 | KIAA0408                                                                                              |
| Ssc.20199.2.S1_at   | -2.35 | 0.004318 | HIVEP2   | Human immunodeficiency virus type I enhancer-binding protein 2                                        |
| Ssc.11966.1.S1_at   | -2.36 | 0.003788 | SHMT2    | Serine hydroxymethyltransferase, mitochondrial precursor                                              |
| Ssc.16956.1.A1_at   | -2.37 | 0.006524 | TCP1     | T-complex protein 1, alpha subunit                                                                    |
| Ssc.7517.1.A1_at    | -2.37 | 0.000768 | E2F8     |                                                                                                       |
| Ssc.17356.1.S1_at   | -2.38 | 0.005637 | MON2     | SF21 protein                                                                                          |
| Ssc.12259.1.A1_at   | -2.39 | 0.006827 | MARS     | Methionyl-tRNA synthetase                                                                             |
| Ssc.18444.1.S1_at   | -2.39 | 0.004073 | GARS     | Glycyl-tRNA synthetase                                                                                |
| Ssc.31082.1.A1_at   | -2.39 | 0.000283 | CD55     | Complement decay-accelerating factor precursor (CD55 antigen)                                         |
| Ssc.11086.1.A1_at   | -2.40 | 0.00954  | SLA      | SRC-like-adaptor                                                                                      |
| Ssc.29157.1.A1_at   | -2.40 | 0.005866 | ADAM9    | ADAM 9 precursor                                                                                      |
| Ssc.11101.1.S1_at   | -2.41 | 0.006713 | STK24    | Serine/threonine-protein kinase 24                                                                    |
| Ssc.7570.2.S1_at    | -2.42 | 0.001925 | SLC1A1   | Excitatory amino acid transporter 3                                                                   |
| Ssc.8443.1.A1_at    | -2.45 | 0.002163 | TSPAN16  | Tetraspanin TM4-B                                                                                     |
| Ssc.2033.1.S1_at    | -2.49 | 0.002774 | CRY1     | cryptochrome 1 (photolyase-like) [Homo sapiens]                                                       |
| Ssc.24781.1.A1_at   | -2.50 | 0.007872 | KIAA1712 | KIAA1712                                                                                              |
| Ssc.5638.1.S1_at    | -2.50 | 0.006434 | FKBP4    | FK506-binding protein 4                                                                               |
| Ssc.1986.1.S1_at    | -2.50 | 0.004669 | PTGS1    | Prostaglandin G/H synthase 1 precursor                                                                |
| Ssc.9655.1.A1_at    | -2.50 | 0.004019 | CSDA     | DNA-binding protein A                                                                                 |
| Ssc.8904.1.A1_at    | -2.55 | 0.001803 | ADAMTSL3 | a disintegrin-like and metalloprotease domain with thrombospondin type I motifs-like 3 [Homo sapiens] |
| Ssc.11037.1.S1_at   | -2.57 | 0.005197 | RCC2     | RCC1-like [Homo sapiens]                                                                              |
| Ssc.5772.1.A1_at    | -2.58 | 0.001043 | IL27RA   | class I cytokine receptor; T-cell cytokine receptor [Homo sapiens]                                    |

|                    |       |          |          |                                                                             |
|--------------------|-------|----------|----------|-----------------------------------------------------------------------------|
| Ssc.9778.1.S1_at   | -2.59 | 0.005491 | COL1A1   | Collagen alpha 1(I) chain precursor                                         |
| Ssc.6918.1.A1_at   | -2.60 | 0.004696 | ACSL4    | Long-chain-fatty-acid--CoA ligase 4                                         |
| Ssc.8271.1.S1_at   | -2.63 | 0.007488 | NETO2    | neuropilin- and tolloid-like protein 2 precursor [Homo sapiens]             |
| Ssc.22631.1.S1_at  | -2.65 | 0.008876 | GFPT1    | Glucosamine--fructose-6-phosphate aminotransferase [isomerizing] 1          |
| Ssc.10573.1.A1_at  | -2.65 | 0.005013 | QKI      | quaking homolog, KH domain RNA binding isoform HQK-5 [Homo sapiens]         |
| Ssc.17325.1.S1_at  | -2.69 | 0.005984 | CD24L4   | Signal transducer CD24 precursor                                            |
| Ssc.373.1.S1_at    | -2.70 | 0.003095 | MGP      | Matrix Gla-protein precursor (MGP)                                          |
| Ssc.4985.1.A1_at   | -2.70 | 0.000857 | ITGA2    |                                                                             |
| Ssc.7570.1.A1_at   | -2.70 | 0.000237 | SLC1A1   | Excitatory amino acid transporter 3                                         |
| Ssc.9951.1.A1_at   | -2.71 | 0.005638 | GNPNAT1  | Glucosamine 6-phosphate N-acetyltransferase                                 |
| Ssc.30817.1.A1_at  | -2.74 | 0.003163 | ADAM9    | ADAM 9 precursor                                                            |
| Ssc.6474.1.S1_at   | -2.74 | 0.001134 | GSR      | Glutathione reductase, mitochondrial precursor                              |
| Ssc.15899.1.S1_at  | -2.75 | 0.008765 | PLK2     | Serine/threonine-protein kinase PLK2                                        |
| Ssc.21217.1.A1_at  | -2.77 | 0.001089 | FAM72A   | MGC57827 protein (Novel protein)                                            |
| Ssc.21647.1.A1_at  | -2.78 | 0.009348 | CEP55    |                                                                             |
| Ssc.8232.1.A1_at   | -2.79 | 0.00346  | ATP6V0A2 | Vacuolar proton translocating ATPase 116 kDa subunit a isoform 2            |
| Ssc.13346.1.A1_at  | -2.79 | 0.003169 | FRMD5    |                                                                             |
| Ssc.5821.1.S1_at   | -2.81 | 0.002969 | STIL     | TAL1 (SCL) interrupting locus [Homo sapiens]                                |
| Ssc.2264.1.S1_at   | -2.84 | 0.009244 | SLC1A5   | Neutral amino acid transporter B(0)                                         |
| Ssc.8726.1.A1_at   | -2.85 | 0.007691 | PPAT     | Amidophosphoribosyltransferase precursor                                    |
| Ssc.30897.1.A1_at  | -2.85 | 0.003905 | PLCH1    | PLCL3 protein (Fragment)                                                    |
| Ssc.24768.1.S1_at  | -2.87 | 0.00857  | NT5DC1   | 5-nucleotidase, cytosolic II-like 1 protein [Homo sapiens]                  |
| Ssc.12780.1.S1_at  | -2.92 | 0.003286 | SQRDL    | Sulfide:quinone oxidoreductase, mitochondrial precursor                     |
| Ssc.25774.1.S1_at  | -3.05 | 0.004989 | TMEM48   |                                                                             |
| Ssc.19365.1.S1_at  | -3.09 | 0.009651 | FAM26F   | PREDICTED: similar to gene; RIKEN cDNA 2810048G17                           |
| Ssc.4104.1.S1_at   | -3.10 | 0.005471 | DDIT4    | RTP801; HIF-1 responsive RTP801 [Homo sapiens]                              |
| Ssc.11879.1.A1_at  | -3.11 | 0.003967 | CDC6     | Cell division control protein 6 homolog                                     |
| Ssc.229.1.S1_at    | -3.13 | 0.00376  | FMO1     | Dimethylaniline monooxygenase [N-oxide-forming] 1                           |
| Ssc.61.1.S1_at     | -3.13 | 0.003269 | C3       | Complement C3 precursor [Contains: C3a anaphylatoxin].                      |
| Ssc.11489.1.A1_at  | -3.16 | 0.009469 | BCAS3    | Breast carcinoma amplified sequence 3                                       |
| Ssc.8808.1.A1_at   | -3.18 | 0.003891 | PTPLAD2  | similar to RIKEN 4933428I03                                                 |
| Ssc.16839.1.S1_at  | -3.19 | 0.000276 | DDAH1    | NG,NG-dimethylarginine dimethylaminohydrolase 1                             |
| Ssc.21959.1.S1_at  | -3.24 | 0.003219 | CARS     | CysteinyI-tRNA synthetase                                                   |
| Ssc.7446.1.S1_a_at | -3.27 | 0.007285 | PPID     | 40 kDa peptidyl-prolyl cis-trans isomerase                                  |
| Ssc.15660.1.S1_at  | -3.27 | 0.003768 | SYS1     | Protein C20orf35 (HSMNP1)                                                   |
| Ssc.18072.1.A1_at  | -3.32 | 0.007593 | LRRC4C   | netrin-G1 ligand [Homo sapiens]                                             |
| Ssc.21667.1.A1_at  | -3.41 | 0.004578 | TMEM154  |                                                                             |
| Ssc.11437.1.A1_at  | -3.43 | 0.007446 | DDIT4L   | DNA-damage-inducible transcript 4-like [Homo sapiens]                       |
| Ssc.5364.1.S1_at   | -3.49 | 0.008073 | FAM78B   | PREDICTED: similar to gene                                                  |
| Ssc.22621.1.S1_at  | -3.49 | 0.00047  | C4BPA    | C4b-binding protein alpha chain precursor                                   |
| Ssc.11405.1.A1_at  | -3.54 | 0.003242 | KCNE3    | Potassium voltage-gated channel subfamily E member 3                        |
| Ssc.8442.1.A1_at   | -3.55 | 0.005708 | STK39    | STE20/SPS1-related proline-alanine rich protein kinase                      |
| Ssc.17140.1.A1_at  | -3.55 | 0.000835 | B4GALT4  | Beta-1,4-galactosyltransferase 4                                            |
| Ssc.6169.1.S1_at   | -3.56 | 0.006027 | ECM1     | Extracellular matrix protein 1 precursor                                    |
| Ssc.7176.1.A1_at   | -3.57 | 0.001734 | CXCR4    | C-X-C chemokine receptor type 4                                             |
| Ssc.8261.1.A1_at   | -3.62 | 0.003226 | CYP2C9   | Cytochrome P450 2C9                                                         |
| Ssc.271.1.A1_at    | -3.83 | 0.000324 | CD55     | Complement decay-accelerating factor precursor (CD55 antigen)               |
| Ssc.18084.1.S1_at  | -3.92 | 0.001605 | DNAJC12  | DnaJ homolog subfamily C member 12 (J domain containing protein 1)          |
| Ssc.5966.1.A1_at   | -4.05 | 0.006772 | CRELD2   |                                                                             |
| Ssc.22750.1.S1_at  | -4.07 | 0.004842 | EVII     | Ecotropic virus integration 1 site protein                                  |
| Ssc.14379.1.A1_at  | -4.30 | 0.001594 | SLC8A1   | Sodium/calcium exchanger 1 precursor                                        |
| Ssc.25033.1.A1_at  | -4.36 | 0.004067 | IL6ST    | Interleukin-6 receptor beta chain precursor                                 |
| Ssc.17068.1.A1_at  | -4.38 | 0.006227 | USP34    | ubiquitin specific protease 34 [Homo sapiens]                               |
| Ssc.30669.1.A1_at  | -4.50 | 0.001513 | FAM3D    | Protein FAM3D precursor (UNQ567/PRO1130)                                    |
| Ssc.18766.2.A1_at  | -4.64 | 0.004322 | OLFM4    | olfactomedin 4 precursor [Homo sapiens]                                     |
| Ssc.2087.1.S1_at   | -4.66 | 0.008344 | HYOU1    | 150 kDa oxygen-regulated protein precursor                                  |
| Ssc.14374.1.A1_at  | -4.68 | 0.002937 | GLRA2    | Glycine receptor alpha-2 chain precursor                                    |
| Ssc.11992.1.A1_at  | -4.80 | 0.008672 | CLU      | Clusterin precursor                                                         |
| Ssc.30320.1.S1_at  | -4.80 | 0.001184 | EPB41L4A | Band 4.1-like protein 4A (NBL4 protein)                                     |
| Ssc.670.1.S1_at    | -4.82 | 0.009723 | LYZ      | Lysozyme C precursor                                                        |
| Ssc.8767.1.A1_at   | -5.00 | 0.005837 | CYP1B1   | Cytochrome P450 1B1                                                         |
| Ssc.26445.1.S1_at  | -5.03 | 0.009001 | GNE      | Bifunctional UDP-N-acetylglucosamine 2-epimerase/N-acetylmannosamine kinase |
| Ssc.272.1.S1_a_at  | -5.21 | 0.001518 | CD55     | Complement decay-accelerating factor precursor (CD55 antigen)               |
| Ssc.9208.2.A1_s_at | -5.36 | 0.007938 | ANKRD10  | Ankyrin repeat domain protein 10                                            |
| Ssc.15518.1.A1_at  | -5.57 | 0.00118  | BCL6     | B-cell lymphoma 6 protein                                                   |
| Ssc.27507.1.S1_at  | -5.67 | 0.000394 | ACOT7    | Cytosolic acyl coenzyme A thioester hydrolase                               |
| Ssc.178.1.S1_at    | -5.68 | 0.009707 | ABO      | Histo-blood group ABO system transferase                                    |
| Ssc.10460.1.S1_at  | -5.94 | 0.000118 | BF       | Complement factor B precursor                                               |
| Ssc.658.1.S1_at    | -5.95 | 0.002535 | IL8      | Interleukin-8 precursor                                                     |

|                     |         |          |           |                                                                        |
|---------------------|---------|----------|-----------|------------------------------------------------------------------------|
| Ssc.22512.1.S1_at   | -6.13   | 0.002664 | NUCB2     | Nucleobindin 2 precursor (DNA-binding protein NEFA)                    |
| Ssc.23500.1.S1_s_at | -6.27   | 1.12E-05 | SFTPD     | Pulmonary surfactant-associated protein D precursor (SP-D) (PSP-D)     |
| Ssc.19393.1.S1_at   | -6.45   | 8.04E-06 | DMBT1     | deleted in malignant brain tumors 1 isoform b precursor [Homo sapiens] |
| Ssc.24901.1.A1_at   | -6.48   | 4.72E-05 | C20orf118 | DJ132F21.2                                                             |
| Ssc.15980.1.S1_at   | -6.84   | 0.001645 | LBP       | Lipopolysaccharide-binding protein precursor (LBP)                     |
| Ssc.25242.1.A1_at   | -6.94   | 0.000703 | EHF       | ets homologous factor; epithelium-specific ets factor 3 [Homo sapiens] |
| Ssc.26175.1.S1_at   | -7.00   | 0.001413 | PRKCA     | Protein kinase C, alpha type                                           |
| Ssc.21805.1.S1_at   | -7.02   | 7.71E-06 | C4BPB     | C4b-binding protein beta chain precursor                               |
| Ssc.3012.1.S1_at    | -7.13   | 0.003503 | UPP1      | Uridine phosphorylase 1                                                |
| Ssc.18766.1.S1_at   | -7.39   | 0.003406 | OLFM4     | olfactomedin 4 precursor [Homo sapiens]                                |
| Ssc.11609.1.A1_at   | -7.83   | 0.003805 | ASNS      | Asparagine synthetase [glutamine-hydrolyzing]                          |
| Ssc.16470.2.A1_at   | -7.87   | 0.000285 | REG3A     | Pancreatitis-associated protein 1 precursor                            |
| Ssc.23981.1.A1_at   | -8.31   | 0.000428 | GALNT12   | Polypeptide N-acetylgalactosaminyltransferase 12                       |
| Ssc.5104.1.S1_at    | -8.62   | 0.004481 | NLN1      | Nuclear protein 1                                                      |
| Ssc.5545.1.S1_at    | -8.70   | 0.001253 | ATP10B    | Potential phospholipid-transporting ATPase VB                          |
| Ssc.3509.1.S1_at    | -8.97   | 0.009974 | HK2       | Hexokinase, type II                                                    |
| Ssc.26345.1.S1_at   | -9.27   | 0.007469 | F13A1     | Coagulation factor XIII A chain precursor                              |
| Ssc.823.1.A1_at     | -9.30   | 0.001003 | 0         | 57 kDa protein                                                         |
| Ssc.5333.1.S1_at    | -9.62   | 0.002928 | TSPAN1    | Tetraspanin 1                                                          |
| Ssc.719.1.S1_at     | -9.96   | 0.009659 | CXCL6     | Small inducible cytokine B6 precursor                                  |
| Ssc.24188.1.A1_at   | -10.68  | 0.001578 | PF4       | Platelet factor 4 precursor                                            |
| Ssc.719.1.S1_a_at   | -11.04  | 0.008798 | CXCL6     | Small inducible cytokine B6 precursor                                  |
| Ssc.17026.1.S1_at   | -11.91  | 0.001204 | C4A       | Complement C4 precursor [Contains: C4a anaphylatoxin]                  |
| Ssc.5053.1.S1_at    | -13.70  | 0.00188  | CD163     | CD163 antigen isoform a; macrophage-associated antigen [Homo sapiens]  |
| Ssc.24282.1.S1_at   | -15.96  | 0.009091 | CXCL2     | Macrophage inflammatory protein-2-alpha precursor                      |
| Ssc.670.2.S1_at     | -16.33  | 0.003248 | LYZ       | Lysozyme C precursor                                                   |
| Ssc.319.1.S1_at     | -17.89  | 6.77E-05 | SFTPD     | Pulmonary surfactant-associated protein D precursor                    |
| Ssc.18918.1.A1_at   | -18.14  | 0.007145 | GPX2      | Glutathione peroxidase-gastrointestinal                                |
| Ssc.14444.3.A1_a_at | -19.63  | 7.94E-05 | ARG2      | Arginase II, mitochondrial precursor                                   |
| Ssc.21108.1.S1_at   | -24.23  | 3.77E-05 | C5        | Complement C5 precursor [Contains: C5a anaphylatoxin]                  |
| Ssc.19692.1.S1_at   | -29.08  | 0.002108 | CXCL2     | Macrophage inflammatory protein-2-alpha precursor                      |
| Ssc.2381.1.A1_at    | -55.48  | 0.000269 | S100A9    | Calgranulin B                                                          |
| Ssc.16470.1.S1_a_at | -164.80 | 0.001167 | REG3A     | Pancreatitis-associated protein 1 precursor                            |
