# Supplementary material
Source: PubMed Central journal article supplement (PMC4073901)
Supplement: tableS4.pdf [file tableS4.pdf]

Table S4. Microarray data submitted to the National Center for Biotechnology Information (NCBI)

Gene Expression Omnibus (accession number GSE48125; <http://www.ncbi.nlm.nih.gov/geo>).

Differentially expressed genes ( $P < 0.01$ ,  $FC > 2$ ) in the distal small intestine (ANTI vs. CON).

| ID                  | FC     | P.Value | Gene Symbol | Gene Title                                                                          |
|---------------------|--------|---------|-------------|-------------------------------------------------------------------------------------|
| Ssc.51.1.S1_at      | 229.86 | 0.00000 | TDH         | L-threonine dehydrogenase (TDH) on chromosome 8                                     |
| Ssc.22934.1.S1_at   | 19.79  | 0.00000 | BTRC        | F-box/WD-repeat protein 1A                                                          |
| Ssc.909.1.S1_at     | 14.49  | 0.00000 | XIRP2       |                                                                                     |
| Ssc.29893.1.A1_at   | 13.49  | 0.00001 | RHOBTB3     | Rho-related BTB domain-containing protein 3                                         |
| Ssc.15648.1.S1_at   | 12.60  | 0.00150 | BEX4        | PREDICTED: brain expressed X-linked-like 1                                          |
| Ssc.18979.1.A1_at   | 11.21  | 0.00000 | PEAR1       | OTTHUMP0000060123 (Novel protein similar to mouse Jedi soluble isoform 736 protein) |
| Ssc.12400.1.S1_at   | 10.27  | 0.00002 | SLC2A8      | Solute carrier family 2, facilitated glucose transporter, member 8                  |
| Ssc.12505.1.A1_at   | 9.61   | 0.00121 | CLGN        | Calmegin precursor                                                                  |
| Ssc.25636.1.S1_at   | 9.25   | 0.00006 | ENPP5       |                                                                                     |
| Ssc.21954.2.A1_at   | 9.09   | 0.00000 | NAGLU       | Alpha-N-acetylglucosaminidase precursor                                             |
| Ssc.5538.1.S1_at    | 8.85   | 0.00464 | CA2         | Carbonic anhydrase II                                                               |
| Ssc.19466.1.A1_at   | 8.80   | 0.00005 | HOMER1      | Homer protein homolog 1                                                             |
| Ssc.16365.1.S1_at   | 8.69   | 0.00000 | UPK3A       | Uroplakin 3A precursor                                                              |
| Ssc.1847.1.S1_at    | 8.54   | 0.00000 | MYBPC3      | Myosin-binding protein C, cardiac-type                                              |
| Ssc.11201.1.A1_at   | 8.05   | 0.00000 | RASGRP1     | RAS guanyl releasing protein 1 [Homo sapiens]                                       |
| Ssc.8871.2.A1_at    | 8.04   | 0.00000 | CDKN1C      | Cyclin-dependent kinase inhibitor 1C                                                |
| Ssc.8871.1.S1_at    | 7.82   | 0.00000 | CDKN1C      | Cyclin-dependent kinase inhibitor 1C                                                |
| Ssc.8516.1.A1_at    | 7.81   | 0.00191 | GSTA1       | Glutathione S-transferase A1                                                        |
| Ssc.23770.1.S1_at   | 6.85   | 0.00297 | ARSB        | Arylsulfatase B precursor                                                           |
| Ssc.3600.1.S1_at    | 6.57   | 0.00083 | KBTBD11     |                                                                                     |
| Ssc.6083.1.A1_at    | 6.45   | 0.00000 | Q5QGT7      | 47 kDa protein                                                                      |
| Ssc.30258.1.A1_at   | 6.14   | 0.00000 | CLGN        | Calmegin precursor                                                                  |
| Ssc.18443.2.A1_at   | 6.01   | 0.00370 | MSH5        | MutS protein homolog 5                                                              |
| Ssc.1492.2.A1_at    | 5.91   | 0.00000 | GNB5        | Guanine nucleotide-binding protein beta subunit 5                                   |
| Ssc.18270.1.S1_at   | 5.87   | 0.00058 | CACNG8      | Voltage-dependent calcium channel gamma-8 subunit                                   |
| Ssc.1342.1.S1_at    | 5.68   | 0.00585 | APOE        | Apolipoprotein E precursor (Apo-E)                                                  |
| Ssc.9669.1.S1_at    | 5.20   | 0.00088 | CDK5        | Cell division protein kinase 5                                                      |
| Ssc.12965.1.A1_at   | 5.10   | 0.00005 | SPRY3       | Sprouty homolog 3 (Spry-3)                                                          |
| Ssc.1524.1.S1_at    | 5.09   | 0.00056 | C22orf9     | C22orf9 protein (Fragment)                                                          |
| Ssc.23310.1.S1_at   | 4.97   | 0.00285 | NEU1        | Sialidase 1 precursor                                                               |
| Ssc.21333.1.S1_at   | 4.83   | 0.00134 | OSGIN2      | Protein C8orf1 (hT41)                                                               |
| Ssc.7751.1.A1_at    | 4.72   | 0.00003 | FAM82A1     |                                                                                     |
| Ssc.2779.1.A1_at    | 4.61   | 0.00729 | NAGA        | Alpha-N-acetylgalactosaminidase precursor                                           |
| Ssc.18608.1.S1_at   | 4.57   | 0.00331 | RBP5        | Retinol-binding protein III, cellular                                               |
| Ssc.5348.1.S1_at    | 4.57   | 0.00001 | OSGIN2      | Protein C8orf1 (hT41)                                                               |
| Ssc.30871.1.A1_at   | 4.56   | 0.00004 | TP53INP1    | tumor protein p53 inducible nuclear protein 1 [Homo sapiens]                        |
| Ssc.7039.1.A1_at    | 4.52   | 0.00004 | NGFRAP1     | p75NTR-associated cell death executor                                               |
| Ssc.16105.1.S1_at   | 4.51   | 0.00001 | BHMT        | Betaine--homocysteine S-methyltransferase                                           |
| Ssc.30148.1.A1_at   | 4.50   | 0.00010 | RHOBTB3     | Rho-related BTB domain-containing protein 3                                         |
| Ssc.6736.1.S1_at    | 4.49   | 0.00001 | MSX2        | Homeobox protein MSX-2 (Hox-8)                                                      |
| Ssc.9717.3.A1_at    | 4.31   | 0.00133 | TRIM2       | Tripartite motif protein 2                                                          |
| Ssc.19052.1.S1_s_at | 4.28   | 0.00001 | TMEM9       | Transmembrane protein 9 precursor                                                   |
| Ssc.14081.1.A1_at   | 4.26   | 0.00554 | C1orf59     |                                                                                     |
| Ssc.3780.1.A1_at    | 4.20   | 0.00818 | SLC16A13    | monocarboxylate transporter 13 [Homo sapiens]                                       |
| Ssc.4105.1.S1_at    | 3.97   | 0.00227 | GPRC5C      | G protein-coupled receptor family C group 5 member C precursor                      |
| Ssc.973.1.A1_at     | 3.93   | 0.00129 | FAM149A     |                                                                                     |
| Ssc.9717.1.A1_at    | 3.91   | 0.00107 | TRIM2       | Tripartite motif protein 2                                                          |
| Ssc.3960.1.S1_at    | 3.88   | 0.00419 | CDKL2       | cyclin-dependent kinase-like 2                                                      |
| Ssc.3699.1.S1_at    | 3.75   | 0.00669 | PDZD2       | PDZ domain containing 3 isoform a [Homo sapiens]                                    |
| Ssc.5744.1.A1_at    | 3.71   | 0.01009 | FUCA1       | Tissue alpha-L-fucosidase precursor                                                 |
| Ssc.16391.1.A1_at   | 3.58   | 0.00007 | GAS2        | Growth-arrest-specific protein 2                                                    |
| Ssc.26683.1.S1_at   | 3.55   | 0.00001 | ERC1        | ERC protein 1 (ELKS protein)                                                        |
| Ssc.27572.1.S1_at   | 3.54   | 0.00333 | MCCC2       | Methylcrotonyl-CoA carboxylase beta chain, mitochondrial precursor                  |
| Ssc.5801.1.S1_at    | 3.53   | 0.00648 | ERC1        |                                                                                     |
| Ssc.6948.1.A1_at    | 3.52   | 0.00044 | SERPINI1    | Neuroserpin precursor (Protease inhibitor 12)                                       |
| Ssc.2179.1.S1_at    | 3.51   | 0.00018 | PPP2R1A     | Serine/threonine protein phosphatase 2A, 65 kDa regulatory subunit A, alpha isoform |
| Ssc.2038.1.S1_at    | 3.49   | 0.00504 | RAB40B      | Ras-related protein Rab-40B                                                         |
| Ssc.6023.1.S1_at    | 3.45   | 0.00661 | PXMP4       | Peroxisomal membrane protein 4                                                      |
| Ssc.26491.1.A1_at   | 3.44   | 0.00991 | EHD1        | EH-domain containing protein 1                                                      |

|                       |      |         |          |                                                                                      |
|-----------------------|------|---------|----------|--------------------------------------------------------------------------------------|
| Ssc.16635.1.S1_at     | 3.43 | 0.00126 | NUDT14   | Uridine diphosphate glucose pyrophosphatase                                          |
| Ssc.2185.2.S1_at      | 3.39 | 0.00184 | GLB1L    | galactosidase, beta 1-like [Homo sapiens]                                            |
| Ssc.15310.1.S1_at     | 3.39 | 0.00010 | GNAZ     | Guanine nucleotide-binding protein G(z), alpha subunit (G(x) alpha chain) (Gz-alpha) |
| Ssc.16660.1.S1_at     | 3.38 | 0.00594 | VAT1     | Synaptic vesicle membrane protein VAT-1 homolog                                      |
| Ssc.7513.1.S1_at      | 3.36 | 0.00088 | C9orf123 | PREDICTED: chromosome 9 open reading frame 123                                       |
| Ssc.14490.1.S1_at     | 3.36 | 0.00070 | PTGR1    | NADP-dependent leukotriene B4 12-hydroxydehydrogenase                                |
| Ssc.8697.1.A1_at      | 3.32 | 0.00409 | TSC22D1  | Transforming growth factor beta 1 induced transcript 4 protein                       |
| Ssc.24074.1.S1_at     | 3.25 | 0.00211 | CALCOCO2 | nuclear domain 10 protein [Homo sapiens]                                             |
| Ssc.10219.1.A1_at     | 3.21 | 0.00037 | SLC1A6   | Excitatory amino acid transporter 4                                                  |
| Ssc.2795.1.S1_at      | 3.18 | 0.00015 | CCBL1    | Kynurenine--oxoglutarate transaminase I                                              |
| Ssc.22795.1.A1_at     | 3.18 | 0.00002 | RHOBTB3  | Rho-related BTB domain-containing protein 3                                          |
| Ssc.21579.1.S1_at     | 3.17 | 0.00536 | RGL1     | Ral guanine nucleotide dissociation stimulator-like 1                                |
| Ssc.29909.1.A1_at     | 3.17 | 0.00045 | FBXO22   | F-box only protein 22                                                                |
| Ssc.27177.1.S1_at     | 3.15 | 0.00173 | ATP8A1   | Potential phospholipid-transporting ATPase IA                                        |
| Ssc.19180.1.S1_at     | 3.13 | 0.00104 | PXDN     | PREDICTED: Melanoma associated gene                                                  |
| Ssc.4571.3.S1_at      | 3.13 | 0.00018 | GNPTG    | N-acetylglucosamine-1-phosphotransferase, gamma subunit [Homo sapiens]               |
| Ssc.26798.1.S1_at     | 3.11 | 0.00203 | ARSB     | Arylsulfatase B precursor                                                            |
| Ssc.22645.1.S1_at     | 3.07 | 0.00799 | DDX46    | DEAD (Asp-Glu-Ala-Asp) box polypeptide 46 [Homo sapiens]                             |
| Ssc.2095.1.S1_at      | 3.05 | 0.00273 | VEGFB    | Vascular endothelial growth factor B precursor                                       |
| Ssc.26027.1.A1_at     | 3.05 | 0.00003 | SNX30    | similar to (LOC401548), mRNA                                                         |
| Ssc.6877.1.A1_at      | 3.03 | 0.00065 | EXPH5    | Slp homolog lacking C2 domains-b (Exophilin 5)                                       |
| Ssc.19408.2.A1_at     | 3.03 | 0.00040 | C10orf35 |                                                                                      |
| Ssc.776.1.S1_a_at     | 3.02 | 0.00582 | PEPD     | Xaa-Pro dipeptidase                                                                  |
| Ssc.19205.1.A1_at     | 3.02 | 0.00323 | C7orf24  |                                                                                      |
| Ssc.8389.1.A1_at      | 2.97 | 0.00438 | FBXL2    | F-box/LRR-repeat protein 2                                                           |
| Ssc.17424.1.S1_at     | 2.97 | 0.00040 | C10orf11 | Protein C10orf11 (CDA017)                                                            |
| Ssc.9723.1.A1_at      | 2.97 | 0.00001 | TTC39A   |                                                                                      |
| Ssc.27521.1.S1_at     | 2.96 | 0.00851 | ABCD4    | ATP-binding cassette, sub-family D, member 4                                         |
| Ssc.4128.1.A1_at      | 2.95 | 0.00035 | PDE4DIP  | phosphodiesterase 4D interacting protein isoform 3 [Homo sapiens]                    |
| Ssc.4204.1.S1_at      | 2.93 | 0.00016 | GYG1     | Glycogenin-1                                                                         |
| Ssc.19205.2.S1_at     | 2.92 | 0.00928 | C7orf24  |                                                                                      |
| Ssc.21167.2.A1_at     | 2.92 | 0.00358 | ELAC2    | Zinc phosphodiesterase ELAC protein 2                                                |
| Ssc.6345.1.S1_at      | 2.92 | 0.00004 | MORC4    | Zinc finger CW-type coiled-coil domain protein 2                                     |
| Ssc.17582.1.A1_a_at   | 2.90 | 0.00346 | RFESD    | LOC317671 [Homo sapiens]                                                             |
| Ssc.18203.1.S1_a_at   | 2.90 | 0.00014 | EIF4E2   | Eukaryotic translation initiation factor 4E type 3                                   |
| Ssc.8524.1.A1_at      | 2.87 | 0.00650 | C17orf79 |                                                                                      |
| Ssc.7585.1.A1_at      | 2.87 | 0.00019 | ZNF709   |                                                                                      |
| Ssc.7219.1.A1_at      | 2.86 | 0.00587 | ERC2     | ERC protein 2                                                                        |
| Ssc.27239.1.S1_at     | 2.85 | 0.00219 | KLF12    | Kruppel-like factor 12                                                               |
| Ssc.9010.1.A1_at      | 2.85 | 0.00091 | TMEM9    | Transmembrane protein 9 precursor                                                    |
| Ssc.7292.1.S1_at      | 2.84 | 0.00033 | FANCC    | Fanconi anemia group C protein                                                       |
| AFFX-ThrX-5_at        | 2.82 | 0.00548 | thrC     |                                                                                      |
| Ssc.2825.1.S1_at      | 2.81 | 0.00917 | GSTA1    | Glutathione S-transferase A1                                                         |
| AFFX-r2-Bs-thr-5_s_at | 2.78 | 0.00623 | thrC     |                                                                                      |
| Ssc.4986.1.S1_at      | 2.74 | 0.00599 | Q8N799   |                                                                                      |
| Ssc.4522.1.S1_at      | 2.74 | 0.00107 | ACAD9    | Acyl-CoA dehydrogenase family member 9, mitochondrial precursor                      |
| Ssc.9176.1.A1_at      | 2.73 | 0.00667 | AEBP2    | AE binding protein 2 [Homo sapiens]                                                  |
| Ssc.26371.1.S1_at     | 2.73 | 0.00236 | METTL11A | AD-003 protein [Homo sapiens]                                                        |
| Ssc.18377.1.S1_at     | 2.73 | 0.00000 | P2RX4    | P2X purinoceptor 4                                                                   |
| Ssc.17458.1.S1_at     | 2.72 | 0.00003 | DMXL2    | rabconnectin-3 [Homo sapiens]                                                        |
| Ssc.26315.1.S1_at     | 2.71 | 0.00096 | AMN1     |                                                                                      |
| Ssc.24849.1.S1_at     | 2.70 | 0.00318 | PCDH9    | Protocadherin 9 precursor                                                            |
| Ssc.25314.2.S1_at     | 2.70 | 0.00161 | AHCY     | Adenosylhomocysteinase                                                               |
| Ssc.10695.1.A1_at     | 2.69 | 0.00947 | ACSS3    |                                                                                      |
| Ssc.18721.2.A1_s_at   | 2.69 | 0.00885 | LAMC1    | Laminin gamma-1 chain precursor                                                      |
| Ssc.21565.1.S1_at     | 2.69 | 0.00826 | NAGPA    | N-acetylglucosamine-1-phosphodiester alpha-N-acetylglucosaminidase [Homo sapiens]    |
| Ssc.30604.1.S1_at     | 2.68 | 0.00440 | C18orf18 | MGC17515 protein                                                                     |
| Ssc.28035.1.A1_at     | 2.68 | 0.00354 | C5orf42  |                                                                                      |
| Ssc.6989.1.A1_at      | 2.68 | 0.00191 | SFXN1    | Sideroflexin 1                                                                       |
| Ssc.26985.1.S1_at     | 2.68 | 0.00040 | LACTB2   | lactamase, beta 2 [Homo sapiens]                                                     |
| Ssc.3358.1.S1_at      | 2.66 | 0.00310 | MCEE     | methylmalonyl-CoA epimerase [Homo sapiens]                                           |
| Ssc.29225.1.A1_at     | 2.66 | 0.00000 | OSBPL1A  | Oxysterol binding protein-related protein 1                                          |
| Ssc.21898.1.S1_at     | 2.65 | 0.00474 | ERO1L    | ERO1-like protein alpha precursor                                                    |
| Ssc.18377.2.S1_at     | 2.65 | 0.00003 | P2RX4    | P2X purinoceptor 4                                                                   |
| Ssc.1281.1.S1_at      | 2.64 | 0.00527 | CRADD    | Death domain containing protein CRADD                                                |
| Ssc.17284.1.A1_at     | 2.63 | 0.00420 | ALDH7A1  | UDP-glucuronate decarboxylase 1 [Homo sapiens].                                      |
| Ssc.26819.1.A1_at     | 2.63 | 0.00211 | FGD4     | FYVE, RhoGEF and PH domain containing 4 [Homo sapiens]                               |
| Ssc.21896.1.S1_at     | 2.63 | 0.00008 | WDR81    |                                                                                      |
| Ssc.3004.2.S1_at      | 2.62 | 0.00920 | C9orf16  |                                                                                      |

|                     |      |         |           |                                                                                |
|---------------------|------|---------|-----------|--------------------------------------------------------------------------------|
| Ssc.18942.1.S1_at   | 2.62 | 0.00160 | Q6ZUF6    |                                                                                |
| Ssc.15500.1.S1_at   | 2.62 | 0.00105 | RABL5     | RAB, member RAS oncogene family-like 5 [Homo sapiens]                          |
| Ssc.21642.1.S1_at   | 2.61 | 0.00980 | GALK1     | Galactokinase                                                                  |
| Ssc.7036.1.A1_at    | 2.61 | 0.00118 | ZNF32     | Zinc finger protein 32                                                         |
| Ssc.29500.1.A1_at   | 2.61 | 0.00016 | NPAL2     |                                                                                |
| Ssc.3916.1.A1_at    | 2.60 | 0.00369 | MRPL28    | 39S ribosomal protein L28, mitochondrial precursor                             |
| Ssc.5788.1.A1_at    | 2.60 | 0.00002 | SNX5      | Sorting nexin 5                                                                |
| Ssc.27969.1.A1_at   | 2.59 | 0.00503 | PHF20L1   | CGI-72 protein isoform 1 [Homo sapiens]                                        |
| Ssc.12764.1.A1_at   | 2.59 | 0.00002 | C6orf1    |                                                                                |
| Ssc.15587.1.S1_at   | 2.59 | 0.00002 | SLC35B2   | solute carrier family 35 [Homo sapiens]                                        |
| Ssc.24668.1.A1_at   | 2.58 | 0.00717 | CMC1      |                                                                                |
| Ssc.26594.1.S1_at   | 2.58 | 0.00270 | C6orf108  | putative c-Myc-responsive isoform 1 [Homo sapiens]                             |
| Ssc.8648.1.A1_at    | 2.58 | 0.00241 | GRB14     | Growth factor receptor-bound protein 14                                        |
| Ssc.16257.1.S1_at   | 2.58 | 0.00111 | PRKAA2    | 5-AMP-activated protein kinase, catalytic alpha-2 chain                        |
| Ssc.29750.1.A1_at   | 2.58 | 0.00043 | TP53INP1  | tumor protein p53 inducible nuclear protein 1 [Homo sapiens]                   |
| Ssc.13469.1.A1_at   | 2.58 | 0.00009 | OR5D14    | Olfactory receptor 5D14                                                        |
| Ssc.24853.1.S1_at   | 2.57 | 0.00136 | NENF      | SPUF protein precursor                                                         |
| Ssc.25218.2.S1_at   | 2.56 | 0.00131 | IVD       | Isovaleryl-CoA dehydrogenase, mitochondrial precursor                          |
| Ssc.5166.1.A1_at    | 2.55 | 0.01002 | RAB32     | Ras-related protein Rab-32                                                     |
| Ssc.4802.1.A1_at    | 2.55 | 0.00271 | XPO4      | Exportin 4 (Exp4)                                                              |
| Ssc.2353.1.S1_at    | 2.51 | 0.00691 | Q6ZVR3    |                                                                                |
| Ssc.13531.1.A1_at   | 2.50 | 0.00001 | HSD17B2   | Estradiol 17-beta-dehydrogenase 2                                              |
| Ssc.24653.1.S1_at   | 2.50 | 0.00000 | ZNF566    | zinc finger protein 566 [Homo sapiens]                                         |
| Ssc.1238.1.S1_at    | 2.49 | 0.00461 | CYB5R1    | NAD(P)H:quinone oxidoreductase type 3, polypeptide A2 [Homo sapiens]           |
| Ssc.10664.1.S1_at   | 2.49 | 0.00267 | HLF       | Hepatic leukemia factor                                                        |
| Ssc.7531.1.A1_at    | 2.49 | 0.00032 | GALC      | Galactocerebrosidase precursor                                                 |
| Ssc.3971.1.S1_at    | 2.49 | 0.00000 | CHID1     |                                                                                |
| Ssc.3525.1.S1_at    | 2.48 | 0.00487 | HPN       | Serine protease hepsin                                                         |
| Ssc.23813.1.S1_at   | 2.48 | 0.00352 | NUDT6     | Nucleoside diphosphate-linked moiety X motif 6                                 |
| Ssc.27336.1.A1_at   | 2.48 | 0.00024 | ZFAND3    | testis expressed sequence 27 [Homo sapiens]                                    |
| Ssc.1363.1.S1_at    | 2.47 | 0.00057 | FDX1L     |                                                                                |
| Ssc.6570.1.S1_at    | 2.46 | 0.00149 | ALAD      | Delta-aminolevulinic acid dehydratase                                          |
| Ssc.1397.1.S1_at    | 2.46 | 0.00002 | SURF4     | Surfeit locus protein 4                                                        |
| Ssc.15439.1.A1_at   | 2.45 | 0.00082 | C21orf100 |                                                                                |
| Ssc.28048.1.A1_at   | 2.44 | 0.00394 | NRGN      | Neurogranin (Ng) (RC3)                                                         |
| Ssc.30881.1.A1_at   | 2.44 | 0.00133 | C5orf42   |                                                                                |
| Ssc.27438.1.S1_at   | 2.43 | 0.00827 | AGA       | N(4)-(beta-N-acetylglucosaminy)-L-asparaginase precursor                       |
| Ssc.1630.1.S1_at    | 2.41 | 0.00894 | TYRO3     | Tyrosine-protein kinase receptor TYRO3 precursor                               |
| Ssc.21560.2.S1_at   | 2.40 | 0.00119 | ENDOG     | Endonuclease G, mitochondrial precursor                                        |
| Ssc.7572.1.A1_at    | 2.39 | 0.00900 | ACADSB    | Acyl-CoA dehydrogenase, short/branched chain specific, mitochondrial precursor |
| Ssc.19323.1.S1_at   | 2.38 | 0.00819 | FAM114A1  |                                                                                |
| Ssc.16392.2.A1_at   | 2.38 | 0.00177 | MKNK2     | MAP kinase-interacting serine/threonine kinase 2                               |
| Ssc.12176.3.S1_at   | 2.38 | 0.00051 | GPRC5C    | G protein-coupled receptor family C group 5 member C precursor                 |
| Ssc.21828.1.S1_at   | 2.37 | 0.00843 | SLC37A4   | Glucose 6-phosphate translocase                                                |
| Ssc.6582.1.S1_a_at  | 2.37 | 0.00676 | FOXRED1   |                                                                                |
| Ssc.29168.1.A1_at   | 2.37 | 0.00620 | PLA2G4A   | Cytosolic phospholipase A2 (cPLA2)                                             |
| Ssc.21519.1.S1_s_at | 2.37 | 0.00377 | SDC2      | Syndecan-2 precursor (Fibroglycan)                                             |
| Ssc.18236.1.S1_at   | 2.37 | 0.00001 | ZNF783    | Zn-finger, C2H2 type domain containing protein                                 |
| Ssc.7477.1.S1_at    | 2.36 | 0.00985 | Q9P005    |                                                                                |
| Ssc.10636.1.A1_at   | 2.36 | 0.00061 | C7orf63   |                                                                                |
| Ssc.16317.1.A1_at   | 2.36 | 0.00001 | APOB      | Apolipoprotein B-100 precursor                                                 |
| Ssc.3798.1.A1_at    | 2.35 | 0.00336 | SFXN4     | sideroflexin 4 isoform 1 [Homo sapiens]                                        |
| Ssc.18528.1.S1_at   | 2.35 | 0.00272 | MFSD1     | major facilitator superfamily domain containing 1                              |
| Ssc.2052.1.S1_at    | 2.35 | 0.00265 | RAB11FIP5 | Rab11 interacting protein Rip11                                                |
| Ssc.3597.1.S1_at    | 2.34 | 0.00001 | RGL1      | Ral guanine nucleotide dissociation stimulator-like 1                          |
| Ssc.28701.1.S1_at   | 2.33 | 0.00347 | SORBS2    | Arg/Abl-interacting protein 2 isoform 1 [Homo sapiens]                         |
| Ssc.18509.1.S1_at   | 2.32 | 0.00126 | TMEM42    | transmembrane protein 42                                                       |
| Ssc.22290.1.A1_at   | 2.32 | 0.00080 | PNMA1     | Paraneoplastic antigen Ma1                                                     |
| Ssc.30377.1.A1_at   | 2.32 | 0.00041 | TBC1D22A  | TBC1 domain family protein C22orf4                                             |
| Ssc.23532.1.S1_at   | 2.32 | 0.00040 | ABLIM3    | actin binding LIM protein family, member 3 [Homo sapiens]                      |
| Ssc.30107.1.S1_at   | 2.31 | 0.00683 | C10orf59  |                                                                                |
| Ssc.21641.1.A1_at   | 2.31 | 0.00682 | 0         | PREDICTED: similar to 2610030H06Rik protein                                    |
| Ssc.5086.2.S1_at    | 2.31 | 0.00291 | POLR2C    | DNA-directed RNA polymerase II 33 kDa polypeptide                              |
| Ssc.5428.1.A1_at    | 2.30 | 0.00852 | CPNE2     | Copine II                                                                      |
| Ssc.6764.1.A1_at    | 2.30 | 0.00838 | PPP3CA    | Serine/threonine protein phosphatase 2B catalytic subunit, alpha isoform       |
| Ssc.26500.1.A1_at   | 2.30 | 0.00770 | C6orf103  | PREDICTED: chromosome 6 open reading frame 103                                 |
| Ssc.4457.2.S1_at    | 2.30 | 0.00089 | C9orf80   |                                                                                |
| Ssc.28511.1.S1_at   | 2.28 | 0.00156 | CTNNA3    | catenin, alpha 3 [Homo sapiens]                                                |
| Ssc.17842.2.S1_a_at | 2.27 | 0.00343 | STX8      | Syntaxin 8                                                                     |

|                     |      |         |          |                                                                                |
|---------------------|------|---------|----------|--------------------------------------------------------------------------------|
| Ssc.24468.1.A1_at   | 2.26 | 0.00971 | NME7     | Nucleoside diphosphate kinase 7                                                |
| Ssc.12403.1.A1_at   | 2.26 | 0.00766 | C3orf31  |                                                                                |
| Ssc.16030.1.A1_at   | 2.26 | 0.00398 | THR8     | Thyroid hormone receptor beta-1                                                |
| Ssc.4847.1.S1_at    | 2.26 | 0.00003 | TRAPPC2L | hematopoietic stem/progenitor cells 176 [Homo sapiens]                         |
| Ssc.12938.1.A1_at   | 2.25 | 0.00190 | RASAL2   | Ras GTPase-activating protein nGAP                                             |
| Ssc.31069.1.A1_s_at | 2.25 | 0.00065 | DZIP3    | zinc finger DAZ interacting protein 3 [Homo sapiens]                           |
| Ssc.14531.1.S1_at   | 2.25 | 0.00012 | ACADS    | Acyl-CoA dehydrogenase, short-chain specific, mitochondrial precursor          |
| Ssc.17368.1.S1_at   | 2.23 | 0.00489 | ATG2B    |                                                                                |
| Ssc.9627.1.A1_at    | 2.23 | 0.00437 | OVOL2    | Zinc finger protein 339                                                        |
| Ssc.14213.1.S1_at   | 2.22 | 0.00031 | LMBRD2   |                                                                                |
| Ssc.3037.2.S1_at    | 2.22 | 0.00004 | SCPEP1   | Retinoid-inducible serine carboxypeptidase precursor                           |
| Ssc.12099.1.A1_at   | 2.22 | 0.00001 | STX7     | Syntaxin 7                                                                     |
| Ssc.24537.1.A1_at   | 2.21 | 0.00972 | MGMT     | Methylated-DNA--protein-cysteine methyltransferase                             |
| Ssc.4855.1.S1_at    | 2.21 | 0.00562 | COMTD1   | catechol-O-methyltransferase domain containing 1 [Homo sapiens]                |
| Ssc.16831.1.S1_at   | 2.21 | 0.00299 | Q8NDC9   |                                                                                |
| Ssc.31019.1.S1_at   | 2.21 | 0.00148 | KDEL2    | KDEL (Lys-Asp-Glu-Leu) containing 2 [Homo sapiens]                             |
| Ssc.21852.1.S1_at   | 2.21 | 0.00016 | SIL1     | endoplasmic reticulum chaperone SIL1, homolog of yeast [Homo sapiens]          |
| Ssc.11067.1.S1_a_at | 2.21 | 0.00002 | MEGF9    | Multiple EGF-like-domain protein 5 precursor                                   |
| Ssc.979.1.S1_at     | 2.20 | 0.00144 | S100A1   | S-100 protein, alpha chain                                                     |
| Ssc.14190.1.A1_at   | 2.19 | 0.00939 | KLHL1    | Kelch-like protein 1                                                           |
| Ssc.4778.1.S1_at    | 2.19 | 0.00358 | MIPEP    | Mitochondrial intermediate peptidase, mitochondrial precursor                  |
| Ssc.1214.1.S1_at    | 2.19 | 0.00068 | DPP7     | Dipeptidyl-peptidase II precursor                                              |
| Ssc.24902.1.S1_a_at | 2.19 | 0.00063 | CUTA     |                                                                                |
| Ssc.3755.1.A1_at    | 2.18 | 0.00680 | NDUFB5   | NADH-ubiquinone oxidoreductase SGDH subunit, mitochondrial precursor           |
| Ssc.8694.1.A1_at    | 2.18 | 0.00184 | GTF3A    | Transcription factor IIIA                                                      |
| Ssc.11367.1.S1_at   | 2.18 | 0.00076 | VPS41    | Vacuolar assembly protein VPS41 homolog (S53)                                  |
| Ssc.5870.1.S1_at    | 2.18 | 0.00038 | C4orf45  |                                                                                |
| Ssc.10865.1.A1_at   | 2.18 | 0.00000 | NVL      | Nuclear valosin-containing protein-like                                        |
| Ssc.1104.1.S1_at    | 2.17 | 0.00145 | PYGL     | Glycogen phosphorylase, liver form                                             |
| Ssc.1761.1.S1_at    | 2.16 | 0.00635 | NQO2     | NRH dehydrogenase [quinone] 2                                                  |
| Ssc.7290.1.A1_at    | 2.16 | 0.00579 | CAPRIN2  | C1q domain containing 1 isoform 2 [Homo sapiens]                               |
| Ssc.15991.1.S1_at   | 2.16 | 0.00109 | CEBPB    | CCAAT/enhancer binding protein beta                                            |
| Ssc.2489.1.S1_at    | 2.16 | 0.00003 | R3HCC1   | PREDICTED: similar to hypothetical protein                                     |
| Ssc.26103.1.S1_at   | 2.16 | 0.00001 | TFEB     | Transcription factor EB                                                        |
| Ssc.3361.1.S1_at    | 2.15 | 0.00368 | COMM4    | COMM domain containing protein 4                                               |
| Ssc.12931.2.A1_a_at | 2.15 | 0.00081 | MECR     | nuclear receptor-binding factor 1 [Homo sapiens]                               |
| Ssc.25765.1.S1_at   | 2.15 | 0.00024 | MRPS36   | Mitochondrial 28S ribosomal protein S36                                        |
| Ssc.28912.1.S1_at   | 2.14 | 0.00865 | DOLK     | Transmembrane protein 15                                                       |
| Ssc.21287.1.S1_at   | 2.14 | 0.00141 | ZBTB46   | BTB/POZ domain containing protein 4                                            |
| Ssc.9510.1.S1_at    | 2.13 | 0.00721 | CHCHD5   | coiled-coil-helix-coiled-coil-helix domain containing 5 [Homo sapiens]         |
| Ssc.772.1.S1_at     | 2.13 | 0.00246 | CARHSP1  | Calcium-regulated heat stable protein 1                                        |
| Ssc.3714.1.S1_a_at  | 2.13 | 0.00046 | BEX2     | brain expressed X-linked 2; X-linked protein [Homo sapiens]                    |
| Ssc.5258.1.A1_at    | 2.13 | 0.00022 | AATF     | apoptosis antagonizing transcription factor [Homo sapiens]                     |
| Ssc.30702.1.S1_s_at | 2.12 | 0.00701 | PHPT1    | 14 kDa phosphohistidine phosphatase                                            |
| Ssc.2041.3.S1_at    | 2.12 | 0.00486 | YAF2     | YY1-associated factor 2                                                        |
| Ssc.17842.1.S1_at   | 2.12 | 0.00298 | STX8     | Syntaxin 8                                                                     |
| Ssc.21840.1.S1_at   | 2.11 | 0.00252 | NUDT5    | ADP-sugar pyrophosphatase                                                      |
| Ssc.4353.1.A1_at    | 2.11 | 0.00162 | VPS11    | Vacuolar protein sorting 11                                                    |
| Ssc.3730.1.S1_at    | 2.11 | 0.00000 | ETNK2    | Ethanolamine kinase-like protein EK12                                          |
| Ssc.29025.1.A1_at   | 2.10 | 0.00687 | NOL8     | nucleolar protein 8; chromosome 9 open reading frame 34 [Homo sapiens]         |
| Ssc.23760.1.S1_at   | 2.10 | 0.00000 | ECSIT    | evolutionarily conserved signaling intermediate in Toll pathway [Homo sapiens] |
| Ssc.5322.1.S1_at    | 2.09 | 0.00800 | C1orf174 |                                                                                |
| Ssc.8929.1.S1_at    | 2.09 | 0.00775 | TCEAL8   | transcription elongation factor A (SII)-like 8 [Homo sapiens]                  |
| Ssc.29494.1.A1_at   | 2.09 | 0.00129 | PHCA     | Alkaline phytoceramidase                                                       |
| Ssc.24238.1.S1_s_at | 2.08 | 0.00998 | RECQL5   | ATP-dependent DNA helicase Q5                                                  |
| Ssc.20801.1.S1_at   | 2.08 | 0.00666 | FBXO22   | F-box only protein 22                                                          |
| Ssc.9408.1.S1_at    | 2.08 | 0.00347 | CC2D1B   | PREDICTED: KIAA1836 protein                                                    |
| Ssc.12905.1.S1_at   | 2.08 | 0.00178 | UBE2Q2   |                                                                                |
| Ssc.7507.1.A1_at    | 2.08 | 0.00018 | ATP6V1C1 | Vacuolar ATP synthase subunit C                                                |
| Ssc.6940.1.A1_at    | 2.07 | 0.00846 | RAB38    | Ras-related protein Rab-38                                                     |
| Ssc.21750.1.A1_at   | 2.06 | 0.00537 | NUDT8    | nudix (nucleoside diphosphate linked moiety X)-type motif 8 [Homo sapiens]     |
| Ssc.18245.1.A1_at   | 2.06 | 0.00382 | BDH1     | D-beta-hydroxybutyrate dehydrogenase, mitochondrial precursor                  |
| Ssc.3302.1.S1_at    | 2.06 | 0.00135 | C11orf59 |                                                                                |
| Ssc.1525.1.S1_at    | 2.06 | 0.00104 | MFSD7    |                                                                                |
| Ssc.22270.1.S1_at   | 2.04 | 0.00636 | TFB1M    | transcription factor B1, mitochondrial [Homo sapiens]                          |
| Ssc.11910.1.S1_at   | 2.04 | 0.00273 | EPS15    | Epidermal growth factor receptor substrate 15                                  |
| Ssc.4737.1.S1_at    | 2.04 | 0.00211 | AGTRAP   | angiotensin II receptor-associated protein [Homo sapiens]                      |
| Ssc.25314.1.S1_a_at | 2.03 | 0.00543 | AHCY     | Adenosylhomocysteinase                                                         |
| Ssc.20514.1.S1_at   | 2.02 | 0.00557 | ZNF395   | F-box only protein 16                                                          |

|                     |       |         |          |                                                                                                                  |
|---------------------|-------|---------|----------|------------------------------------------------------------------------------------------------------------------|
| Ssc.30705.1.A1_at   | 2.02  | 0.00192 | PPFIA2   | Liprin-alpha 2                                                                                                   |
| Ssc.27419.1.S1_at   | 2.02  | 0.00172 | SLC25A13 | Calcium-binding mitochondrial carrier protein Aralar2                                                            |
| Ssc.5741.1.S1_at    | 2.02  | 0.00051 | PRMT7    | Protein arginine N-methyltransferase                                                                             |
| Ssc.10819.1.S1_at   | 2.01  | 0.00677 | NIT2     | nitrilase family, member 2 [Homo sapiens]                                                                        |
| Ssc.11881.1.A1_a_at | 2.01  | 0.00659 | APPL1    | adaptor protein containing pH domain, PTB domain and leucine zipper motif [Homo sapiens]                         |
| Ssc.2605.1.A1_at    | 2.01  | 0.00550 | FNTB     | Protein farnesyltransferase beta subunit                                                                         |
| Ssc.28156.1.A1_at   | 2.00  | 0.00039 | ZNF782   | Zinc finger protein 126                                                                                          |
| Ssc.3875.1.S1_a_at  | 2.00  | 0.00016 | SNRPN    | Small nuclear ribonucleoprotein associated protein N                                                             |
| Ssc.3445.1.S1_at    | -2.00 | 0.00845 | ARL4C    | ADP-ribosylation factor-like protein 7                                                                           |
| Ssc.14764.1.A1_at   | -2.00 | 0.00434 | GADD45B  | Growth arrest and DNA-damage-inducible protein GADD45 beta                                                       |
| Ssc.18476.2.S1_a_at | -2.00 | 0.00253 | SSH2     | slingshot 2 [Homo sapiens]                                                                                       |
| Ssc.21581.1.S1_at   | -2.01 | 0.00308 | ARID5B   |                                                                                                                  |
| Ssc.5409.2.S1_a_at  | -2.02 | 0.00274 | JMJD6    | phosphatidylserine receptor [Homo sapiens]                                                                       |
| Ssc.21330.1.S1_at   | -2.02 | 0.00226 | ELL      | RNA polymerase II elongation factor ELL                                                                          |
| Ssc.6586.2.A1_a_at  | -2.03 | 0.00783 | CHIC2    | cysteine-rich hydrophobic domain 2 [Homo sapiens]                                                                |
| Ssc.11168.1.A1_at   | -2.03 | 0.00198 | CTRL     | Proteasome subunit beta type 10 precursor                                                                        |
| Ssc.12579.1.A1_s_at | -2.04 | 0.00849 | FGL2     | Fibroleukin precursor                                                                                            |
| Ssc.3975.1.A1_at    | -2.05 | 0.00850 | STK38L   | serine/threonine kinase 38 like; nuclear Dbf2-related 2 [Homo sapiens]                                           |
| Ssc.183.1.S1_at     | -2.06 | 0.00960 | GSTO1    | Glutathione transferase omega 1                                                                                  |
| Ssc.15398.1.A1_at   | -2.06 | 0.00317 | ARHGAP30 |                                                                                                                  |
| Ssc.5257.1.S1_at    | -2.06 | 0.00054 | B3GNT1   | Beta-1,3-galactosyltransferase 7                                                                                 |
| Ssc.12433.1.A1_at   | -2.07 | 0.00234 | ANKS1B   | cajalalin 2 isoform c [Homo sapiens]                                                                             |
| Ssc.6474.1.S1_at    | -2.08 | 0.00966 | GSR      | Glutathione reductase, mitochondrial precursor                                                                   |
| Ssc.2247.1.S1_at    | -2.08 | 0.00284 | INPP1    | Inositol polyphosphate 1-phosphatase                                                                             |
| Ssc.11079.1.A1_at   | -2.08 | 0.00202 | RNASE4   | Angiogenin precursor                                                                                             |
| Ssc.12376.1.A1_at   | -2.09 | 0.00968 | SP110    | Sp110 nuclear body protein                                                                                       |
| Ssc.24736.1.A1_at   | -2.09 | 0.00235 | IFT80    |                                                                                                                  |
| Ssc.494.1.S1_at     | -2.10 | 0.00968 | KCNT2    | sodium- and chloride-activated ATP-sensitive potassium channel [Homo sapiens]                                    |
| Ssc.25195.1.A1_at   | -2.10 | 0.00006 | KIF1B    | Kinesin-like protein KIF1B                                                                                       |
| Ssc.20559.1.A1_at   | -2.11 | 0.00292 | CD59     | CD59 glycoprotein precursor                                                                                      |
| Ssc.1037.1.S1_at    | -2.13 | 0.00488 | ITM2B    | Integral membrane protein 2B                                                                                     |
| Ssc.12013.1.A1_at   | -2.13 | 0.00350 | SYTL4    | Synaptotagmin-like protein 4                                                                                     |
| Ssc.18603.1.A1_at   | -2.13 | 0.00094 | G0S2     | Putative lymphocyte G0/G1 switch protein 2                                                                       |
| Ssc.25227.1.S1_at   | -2.14 | 0.00360 | ARNTL    | Aryl hydrocarbon receptor nuclear translocator-like protein 1                                                    |
| Ssc.19344.1.A1_at   | -2.15 | 0.00343 | ARHGAP25 | Rho-GTPase-activating protein 25                                                                                 |
| Ssc.11790.3.A1_a_at | -2.16 | 0.00594 | PITPNA   | Phosphatidylinositol transfer protein alpha isoform                                                              |
| Ssc.14400.1.A1_at   | -2.16 | 0.00394 | SGMS1    | Phosphatidylcholine:ceramide cholinephosphotransferase 1                                                         |
| Ssc.15727.1.A1_at   | -2.16 | 0.00242 | SC5DL    | Lathosterol oxidase                                                                                              |
| Ssc.54.1.A1_at      | -2.17 | 0.00463 | CD9      | CD9 antigen                                                                                                      |
| Ssc.19350.1.S1_at   | -2.17 | 0.00063 | IER5     | immediate early response 5 [Homo sapiens]                                                                        |
| Ssc.14214.1.A1_a_at | -2.18 | 0.00983 | DDX59    |                                                                                                                  |
| Ssc.11242.1.S1_at   | -2.18 | 0.00586 | LPCAT1   |                                                                                                                  |
| Ssc.7839.1.A1_at    | -2.20 | 0.00220 | EPB41L3  | Band 4.1-like protein 3 (4.1B)                                                                                   |
| Ssc.13780.3.S1_at   | -2.21 | 0.00396 | HLA-A    | HLA class I histocompatibility antigen, A-3 alpha chain precursor                                                |
| Ssc.11874.1.S1_at   | -2.21 | 0.00346 | UBE2V1   | Ubiquitin-conjugating enzyme E2 variant 1                                                                        |
| Ssc.8904.1.A1_at    | -2.23 | 0.00520 | ADAMTSL3 | a disintegrin-like and metalloprotease domain with thrombospondin type I motifs-like 3; punctin-2 [Homo sapiens] |
| Ssc.1948.1.S1_at    | -2.24 | 0.00179 | TMBIM1   | RECS1 protein homolog                                                                                            |
| Ssc.11235.1.S1_at   | -2.25 | 0.00927 | SERPINH1 | Collagen-binding protein 2 precursor                                                                             |
| Ssc.907.1.A1_at     | -2.25 | 0.00017 | P2RY5    | P2Y purinoceptor 5                                                                                               |
| Ssc.23937.1.A1_at   | -2.28 | 0.00625 | SLCO1B1  | Solute carrier organic anion transporter family member 1B1                                                       |
| Ssc.3657.1.A1_at    | -2.30 | 0.00059 | SH3BGR2  | SH3 domain-binding glutamic acid-rich-like protein 2                                                             |
| Ssc.10884.1.A1_at   | -2.34 | 0.00790 | IFI16    | Gamma-interferon-inducible protein Ii-16                                                                         |
| Ssc.1583.1.A1_at    | -2.35 | 0.00421 | AIM1     | Absent in melanoma 1 protein                                                                                     |
| Ssc.21217.1.A1_at   | -2.35 | 0.00385 | FAM72A   | MGC57827 protein                                                                                                 |
| Ssc.7745.1.A1_at    | -2.38 | 0.00650 | CCDC117  |                                                                                                                  |
| Ssc.18955.2.A1_at   | -2.39 | 0.00238 | CD300A   | CMRF35-H antigen precursor                                                                                       |
| Ssc.8865.2.S1_at    | -2.40 | 0.00512 | DUSP6    | Dual specificity protein phosphatase 6                                                                           |
| Ssc.3753.1.S1_at    | -2.40 | 0.00090 | TFRC     | Transferrin receptor protein 1                                                                                   |
| Ssc.1583.2.S1_at    | -2.42 | 0.00575 | AIM1     | Absent in melanoma 1 protein                                                                                     |
| Ssc.1013.1.A1_at    | -2.46 | 0.00163 | MGST1    | Microsomal glutathione S-transferase 1                                                                           |
| Ssc.22123.1.A1_at   | -2.47 | 0.00535 | TMEM2    | transmembrane protein 2 [Homo sapiens]                                                                           |
| Ssc.10025.2.S1_at   | -2.49 | 0.00904 | CEBPD    | CCAAT/enhancer binding protein delta                                                                             |
| Ssc.9734.2.A1_at    | -2.49 | 0.00257 | Q6ZRC1   |                                                                                                                  |
| Ssc.20239.1.A1_at   | -2.52 | 0.00005 | RDH11    | Retinol dehydrogenase 11                                                                                         |
| Ssc.6918.1.A1_at    | -2.53 | 0.00565 | ACSL4    | Long-chain-fatty-acid--CoA ligase 4                                                                              |
| Ssc.324.1.S1_a_at   | -2.54 | 0.00028 | JAK2     | Tyrosine-protein kinase JAK2                                                                                     |
| Ssc.5821.1.S1_at    | -2.55 | 0.00578 | STIL     | TAL1 (SCL) interrupting locus [Homo sapiens]                                                                     |

|                    |       |         |          |                                                                                       |
|--------------------|-------|---------|----------|---------------------------------------------------------------------------------------|
| Ssc.26485.1.S1_at  | -2.56 | 0.00773 | PPP1R14D | protein phosphatase 1, regulatory subunit 14D [Homo sapiens]                          |
| Ssc.17899.1.A1_at  | -2.56 | 0.00436 | PPAP2A   | Lipid phosphate phosphohydrolase 1                                                    |
| Ssc.5108.1.S1_at   | -2.57 | 0.00120 | C9       | Complement component C9 precursor                                                     |
| Ssc.21938.1.S1_at  | -2.57 | 0.00005 | RIMS2    | Regulating synaptic membrane exocytosis protein 2                                     |
| Ssc.6384.1.S1_at   | -2.59 | 0.00136 | RGS4     | Regulator of G-protein signaling 4                                                    |
| Ssc.11689.1.A1_at  | -2.61 | 0.00091 | CCDC41   | NY-REN-58 antigen [Homo sapiens]                                                      |
| Ssc.2080.1.S1_at   | -2.64 | 0.00486 | ARSG     | Arylsulfatase G [Homo sapiens]                                                        |
| Ssc.30508.1.A1_at  | -2.66 | 0.00174 | ZCCHC6   | zinc finger, CCHC domain containing 6                                                 |
| Ssc.6462.1.A1_at   | -2.66 | 0.00164 | PPAP2B   | Lipid phosphate phosphohydrolase 3                                                    |
| Ssc.18456.1.S1_at  | -2.67 | 0.00058 | ETS2     | C-ets-2 protein                                                                       |
| Ssc.12159.1.A1_at  | -2.70 | 0.00087 | NCF1     | Neutrophil cytosol factor 1                                                           |
| Ssc.11790.1.S1_at  | -2.70 | 0.00076 | PITPNA   | Phosphatidylinositol transfer protein alpha isoform                                   |
| Ssc.8682.2.A1_at   | -2.71 | 0.00154 | CSNK1G3  | Casein kinase I, gamma 3 isoform                                                      |
| Ssc.3895.1.A1_at   | -2.71 | 0.00069 | CNTLN    |                                                                                       |
| Ssc.21845.1.S1_at  | -2.72 | 0.00028 | OPHN1    | Oligophrenin 1                                                                        |
| Ssc.18360.1.S1_at  | -2.74 | 0.00089 | CAPG     | Macrophage capping protein                                                            |
| Ssc.10143.1.A1_at  | -2.75 | 0.00280 | BACE2    | Beta secretase 2 precursor                                                            |
| Ssc.26104.1.S1_at  | -2.76 | 0.00940 | SLC9A9   | Sodium/hydrogen exchanger 9                                                           |
| Ssc.28653.1.A1_at  | -2.76 | 0.00507 | CPEB2    | cytoplasmic polyadenylation element binding protein 2 isoform B [Homo sapiens]        |
| Ssc.21647.1.A1_at  | -2.78 | 0.00938 | CEP55    |                                                                                       |
| Ssc.3411.1.A1_at   | -2.78 | 0.00488 | ZFP36    | Tristetraproline                                                                      |
| Ssc.11530.1.S1_at  | -2.81 | 0.00779 | CSRP2    | Cysteine and glycine-rich protein 2                                                   |
| Ssc.12026.1.A1_at  | -2.81 | 0.00052 | CASP7    | Caspase-7 precursor                                                                   |
| Ssc.11073.1.S1_at  | -2.81 | 0.00000 | PSMB8    | Proteasome subunit beta type 8 precursor                                              |
| Ssc.4921.1.S1_a_at | -2.82 | 0.00719 | RAPGEF5  | Rap guanine nucleotide exchange factor 5                                              |
| Ssc.8974.1.S1_at   | -2.83 | 0.00120 | CPT1A    | Carnitine O-palmitoyltransferase I, mitochondrial liver isoform                       |
| Ssc.9561.1.A1_at   | -2.84 | 0.00136 | POLR3A   | DNA-directed RNA polymerase III largest subunit                                       |
| Ssc.25357.1.S1_at  | -2.85 | 0.00776 | IL1R2    | Interleukin-1 receptor, type II precursor                                             |
| Ssc.18261.1.S1_at  | -2.87 | 0.00057 | PSTPIP2  | Proline-serine-threonine phosphatase-interacting protein 2                            |
| Ssc.16839.1.S1_at  | -2.92 | 0.00053 | DDAH1    | NG,NG-dimethylarginine dimethylaminohydrolase 1                                       |
| SscAffx.9.1.S1_at  | -2.95 | 0.00982 | FGL2     | Fibroleukin precursor                                                                 |
| Ssc.507.1.A1_at    | -2.96 | 0.00221 | TYROBP   | TYRO protein tyrosine kinase-binding protein precursor                                |
| Ssc.11004.1.S1_at  | -2.98 | 0.00683 | C1QB     | Complement C1q subcomponent, B chain precursor                                        |
| Ssc.9229.1.S1_at   | -3.01 | 0.00483 | MRC1L1   | Macrophage mannose receptor precursor                                                 |
| Ssc.6163.1.A1_at   | -3.01 | 0.00215 | ETS2     | C-ets-2 protein                                                                       |
| Ssc.5915.1.S1_at   | -3.05 | 0.00924 | CD40     | Tumor necrosis factor receptor superfamily member 5 precursor                         |
| Ssc.11163.1.S1_at  | -3.05 | 0.00385 | SP140    | LYSp100 protein                                                                       |
| Ssc.4578.1.A1_at   | -3.08 | 0.00566 | BCAR3    | breast cancer antiestrogen resistance 3 [Homo sapiens]. [Source:RefSeq;Acc:NM_003567] |
| Ssc.4761.1.S1_at   | -3.08 | 0.00544 | STK24    | Serine/threonine-protein kinase 24                                                    |
| Ssc.19434.1.A1_at  | -3.08 | 0.00171 | C3orf52  |                                                                                       |
| Ssc.17140.1.A1_at  | -3.09 | 0.00198 | B4GALT4  | Beta-1,4-galactosyltransferase 4                                                      |
| Ssc.27507.1.S1_at  | -3.10 | 0.00840 | ACOT7    | Cytosolic acyl coenzyme A thioester hydrolase                                         |
| Ssc.4933.1.A1_at   | -3.10 | 0.00060 | IFNAR2   | Interferon-alpha/beta receptor beta chain precursor                                   |
| Ssc.26577.1.S1_at  | -3.13 | 0.00237 | FA2H     | fatty acid 2-hydroxylase [Homo sapiens]                                               |
| Ssc.24822.1.A1_at  | -3.13 | 0.00010 | HPSE2    | heparanase 2 [Homo sapiens]                                                           |
| Ssc.373.1.S1_at    | -3.14 | 0.00110 | MGP      | Matrix Gla-protein precursor                                                          |
| Ssc.5910.1.A1_at   | -3.14 | 0.00024 | VAV1     | Vav proto-oncogene                                                                    |
| Ssc.23077.1.A1_at  | -3.16 | 0.00018 | APAF1    | Apoptotic protease activating factor 1                                                |
| Ssc.19181.1.S1_at  | -3.17 | 0.00497 | ATAD4    |                                                                                       |
| Ssc.20472.1.S1_at  | -3.18 | 0.00426 | RIPK3    | Receptor-interacting serine/threonine-protein kinase 3                                |
| Ssc.12927.1.S1_at  | -3.21 | 0.00078 | HIGD1A   |                                                                                       |
| Ssc.957.1.S1_at    | -3.23 | 0.00231 | SERPING1 | Plasma protease C1 inhibitor precursor                                                |
| Ssc.2572.1.S1_at   | -3.23 | 0.00027 | PPA1     | Inorganic pyrophosphatase                                                             |
| Ssc.26605.1.S1_at  | -3.25 | 0.00042 | PFKFB2   | 6-phosphofructo-2-kinase/fructose-2,6-biphosphatase 2                                 |
| Ssc.23838.1.A1_at  | -3.27 | 0.00418 | ZRANB2   | Zinc finger protein 265                                                               |
| Ssc.24009.1.S1_at  | -3.31 | 0.00038 | NT5C     | 5(3)-deoxyribonucleotidase, cytosolic type                                            |
| Ssc.10965.2.S1_at  | -3.32 | 0.00005 | MAFB     | Transcription factor MafB                                                             |
| Ssc.6169.1.S1_at   | -3.34 | 0.00826 | ECM1     | Extracellular matrix protein 1 precursor                                              |
| Ssc.167.2.S1_a_at  | -3.34 | 0.00366 | FCGR3B   | Low affinity immunoglobulin gamma Fc region receptor III-A precursor                  |
| Ssc.26060.1.A1_at  | -3.35 | 0.00669 | MAFB     | Transcription factor MafB                                                             |
| Ssc.271.1.A1_at    | -3.35 | 0.00078 | CD55     | Complement decay-accelerating factor precursor                                        |
| Ssc.31109.1.A1_at  | -3.38 | 0.00461 | FBXW10   | F-box and WD-40 domain protein 10 [Homo sapiens]                                      |
| Ssc.17303.1.S1_at  | -3.38 | 0.00266 | PARP2    | Poly [ADP-ribose] polymerase-2                                                        |
| Ssc.7093.1.A1_at   | -3.39 | 0.00002 | HPSE     | heparanase-1 [Homo sapiens]                                                           |
| Ssc.18872.1.A1_at  | -3.41 | 0.00090 | C9       | Complement component C9 precursor                                                     |
| Ssc.1177.1.S1_at   | -3.43 | 0.00131 | C1S      | Complement C1s subcomponent precursor                                                 |
| Ssc.6233.1.S1_at   | -3.45 | 0.00424 | PPAP2B   | Lipid phosphate phosphohydrolase 3                                                    |
| Ssc.12695.1.S1_at  | -3.45 | 0.00045 | ACSL4    | Long-chain-fatty-acid--CoA ligase 4                                                   |
| Ssc.508.1.S1_at    | -3.51 | 0.00321 | FCER1G   | High affinity immunoglobulin epsilon receptor gamma-subunit precursor                 |

|                   |       |         |           |                                                                                  |
|-------------------|-------|---------|-----------|----------------------------------------------------------------------------------|
| Ssc.2635.1.S1_at  | -3.53 | 0.00001 | HSD11B2   | Corticosteroid 11-beta-dehydrogenase, isozyme 2                                  |
| Ssc.16013.1.S1_at | -3.58 | 0.00230 | MMP1      | Interstitial collagenase precursor                                               |
| Ssc.9372.1.A1_at  | -3.59 | 0.00397 | NFKBIZ    | molecule possessing ankyrin repeats induced by lipopolysaccharide [Homo sapiens] |
| Ssc.12316.1.S1_at | -3.59 | 0.00000 | FAM100B   |                                                                                  |
| Ssc.15518.1.A1_at | -3.65 | 0.00802 | BCL6      | B-cell lymphoma 6 protein                                                        |
| Ssc.210.2.S1_a_at | -3.67 | 0.00802 | HLA-DRB1  | HLA class II histocompatibility antigen, DRB1-1 beta chain precursor             |
| Ssc.11162.1.S1_at | -3.72 | 0.00028 | C4BPA     | C4b-binding protein alpha chain precursor                                        |
| Ssc.4759.1.S1_at  | -3.75 | 0.00512 | NFKBIA    | NF-kappaB inhibitor alpha                                                        |
| Ssc.16234.1.S1_at | -3.79 | 0.00134 | TCN1      | Transcobalamin I precursor                                                       |
| Ssc.24695.1.A1_at | -3.86 | 0.00533 | FAM111B   | cancer-associated nucleoprotein [Homo sapiens]                                   |
| Ssc.26356.1.S1_at | -3.88 | 0.00742 | GRAMD3    | HCV NS3-transactivated protein 2 [Homo sapiens]                                  |
| Ssc.30859.1.A1_at | -3.89 | 0.00033 | SUOX      | Sulfite oxidase, mitochondrial precursor                                         |
| Ssc.11086.1.A1_at | -3.91 | 0.00042 | SLA       | SRC-like-adaptor                                                                 |
| Ssc.6025.1.S1_at  | -3.94 | 0.00662 | STAT1     | Signal transducer and activator of transcription 1-alpha/beta                    |
| Ssc.983.1.S1_at   | -3.96 | 0.00180 | C1R       | Complement C1r subcomponent precursor                                            |
| Ssc.8322.1.A1_at  | -3.97 | 0.00387 | C1orf173  |                                                                                  |
| Ssc.9683.1.A1_at  | -4.00 | 0.00006 | Q96AU6    |                                                                                  |
| Ssc.20303.1.S1_at | -4.03 | 0.00346 | PMM1      | Phosphomannomutase 1                                                             |
| Ssc.15370.1.S1_at | -4.05 | 0.00674 | GMFG      | Glia maturation factor gamma                                                     |
| Ssc.27799.1.S1_at | -4.08 | 0.00058 | EFNB2     | Ephrin-B2 precursor                                                              |
| Ssc.17821.1.A1_at | -4.09 | 0.00227 | FAM135A   |                                                                                  |
| Ssc.491.1.S1_at   | -4.10 | 0.00060 | MS4A12    | Membrane-spanning 4-domains subfamily A member 12                                |
| Ssc.17316.1.S1_at | -4.13 | 0.00191 | C1QC      | Complement C1q subcomponent, C chain precursor                                   |
| Ssc.5239.1.S1_at  | -4.16 | 0.00627 | TGM2      | Protein-glutamine gamma-glutamyltransferase                                      |
| Ssc.10022.1.A1_at | -4.17 | 0.00317 | MXD1      |                                                                                  |
| Ssc.19494.1.S1_at | -4.17 | 0.00023 | IRF1      | Interferon regulatory factor 1                                                   |
| Ssc.8942.1.S1_at  | -4.18 | 0.00050 | NLRC5     | nucleotide-binding oligomerization domains 27 [Homo sapiens]                     |
| Ssc.6512.1.S1_at  | -4.19 | 0.00641 | SCARA5    |                                                                                  |
| Ssc.10965.1.A1_at | -4.22 | 0.00009 | MAFB      | Transcription factor MafB                                                        |
| Ssc.19596.1.A1_at | -4.23 | 0.00143 | LPCAT2    |                                                                                  |
| Ssc.11281.1.A1_at | -4.27 | 0.00079 | PENK      | Proenkephalin A precursor                                                        |
| Ssc.8980.1.A1_at  | -4.31 | 0.00240 | ANGPTL4   | Angiopoietin-related protein 4 precursor                                         |
| Ssc.777.1.S1_at   | -4.33 | 0.00056 | HSD11B1   | Corticosteroid 11-beta-dehydrogenase, isozyme 1                                  |
| Ssc.9330.1.A1_at  | -4.45 | 0.00122 | LCP1      | L-plastin                                                                        |
| Ssc.28450.1.S1_at | -4.46 | 0.00186 | MFSD2     |                                                                                  |
| Ssc.3295.2.A1_at  | -4.52 | 0.00752 | EDNRB     | Endothelin B receptor precursor                                                  |
| Ssc.30320.1.S1_at | -4.62 | 0.00143 | EPB41L4A  | Band 4.1-like protein 4A                                                         |
| Ssc.324.3.S1_a_at | -4.70 | 0.00409 | JAK2      | Tyrosine-protein kinase JAK2                                                     |
| SscAffx.1.1.S1_at | -4.70 | 0.00220 | ISG20     | interferon stimulated gene 20kDa [Homo sapiens]                                  |
| Ssc.12781.1.A2_at | -4.75 | 0.00051 | TLR4      | Toll-like receptor 4 precursor                                                   |
| Ssc.18206.1.S1_at | -4.77 | 0.00198 | BACE2     | Beta secretase 2 precursor                                                       |
| Ssc.24901.1.A1_at | -4.77 | 0.00024 | C20orf118 | DJ132F21.2 (Contains a novel protein similar to the L82E from Drosophila)        |
| Ssc.4445.1.A1_at  | -4.78 | 0.00169 | C3orf18   | g20 protein [Homo sapiens]                                                       |
| Ssc.16110.1.A1_at | -4.82 | 0.00051 | BIRC3     | Baculoviral IAP repeat-containing protein 3                                      |
| Ssc.1008.1.A1_at  | -4.84 | 0.00328 | ELOVL6    | ELOVL family member 6, elongation of long chain fatty acids [Homo sapiens]       |
| Ssc.5822.1.S1_at  | -4.87 | 0.00001 | ALOX5AP   | 5-lipoxygenase activating protein                                                |
| Ssc.25242.1.A1_at | -4.93 | 0.00295 | EHF       | ets homologous factor [Homo sapiens]                                             |
| Ssc.5080.1.A1_at  | -4.96 | 0.00108 | GRAMD3    | HCV NS3-transactivated protein 2 [Homo sapiens]                                  |
| Ssc.22354.1.A1_at | -4.96 | 0.00053 | BATF3     | Jun dimerization protein p21SNFT [Homo sapiens]                                  |
| Ssc.7907.1.A1_at  | -4.99 | 0.00866 | ST6GAL1   | CMP-N-acetylneuraminase-beta-galactosamide-alpha-2,6-sialyltransferase           |
| Ssc.15296.1.S1_at | -5.01 | 0.00036 | CD53      | Leukocyte surface antigen CD53                                                   |
| Ssc.9778.1.S1_at  | -5.07 | 0.00008 | COL1A1    | Collagen alpha 1(I) chain precursor                                              |
| Ssc.6163.2.S1_at  | -5.11 | 0.00244 | ETS2      | C-ets-2 protein                                                                  |
| Ssc.8745.1.A1_at  | -5.13 | 0.00508 | SOAT1     | Sterol O-acyltransferase 1                                                       |
| Ssc.20385.1.S1_at | -5.16 | 0.00009 | MKKS      | McKusick-Kaufman/Bardet-Biedl syndromes putative chaperonin                      |
| Ssc.18038.1.A1_at | -5.28 | 0.00878 | MAP3K8    | Mitogen-activated protein kinase kinase kinase 8                                 |
| Ssc.18766.2.A1_at | -5.28 | 0.00249 | OLFM4     | olfactomedin 4 precursor [Homo sapiens]                                          |
| Ssc.61.1.S1_at    | -5.31 | 0.00016 | C3        | Complement C3 precursor [Contains: C3a anaphylatoxin]                            |
| Ssc.22621.1.S1_at | -5.39 | 0.00003 | C4BPA     | C4b-binding protein alpha chain precursor                                        |
| Ssc.15565.1.S1_at | -5.42 | 0.00006 | LCP2      | Lymphocyte cytosolic protein 2                                                   |
| Ssc.229.1.S1_at   | -5.53 | 0.00016 | FMO1      | Dimethylaniline monooxygenase [N-oxide-forming] 1                                |
| Ssc.28997.1.S1_at | -5.67 | 0.00312 | KCNH1     | Potassium voltage-gated channel subfamily H member 1                             |
| Ssc.178.1.S1_at   | -5.83 | 0.00891 | ABO       | Histo-blood group ABO system transferase                                         |
| Ssc.15242.1.S1_at | -5.85 | 0.00099 | TNFRSF1B  | Tumor necrosis factor receptor superfamily member 1B precursor                   |
| Ssc.25890.1.S1_at | -5.93 | 0.00138 | HCK       | Tyrosine-protein kinase HCK                                                      |
| Ssc.26175.1.S1_at | -6.31 | 0.00211 | PRKCA     | Protein kinase C, alpha type                                                     |
| Ssc.19181.2.A1_at | -6.37 | 0.00011 | ATAD4     |                                                                                  |
| Ssc.27863.1.S1_at | -6.54 | 0.00028 | TAP1      | Antigen peptide transporter 1                                                    |
| Ssc.10460.1.S1_at | -6.54 | 0.00007 | BF        | Complement factor B precursor                                                    |

|                     |         |         |        |                                                                                |
|---------------------|---------|---------|--------|--------------------------------------------------------------------------------|
| Ssc.12758.1.A1_at   | -6.71   | 0.00015 | PSMB9  | Proteasome subunit beta type 9 precursor                                       |
| Ssc.25840.1.S1_at   | -6.83   | 0.00609 | EHF    | ets homologous factor [Homo sapiens]                                           |
| Ssc.15296.2.S1_at   | -6.97   | 0.00580 | CD53   | Leukocyte surface antigen CD53                                                 |
| Ssc.24188.1.A1_at   | -7.07   | 0.00580 | PF4    | Platelet factor 4 precursor                                                    |
| Ssc.658.1.S1_at     | -7.20   | 0.00121 | IL8    | Interleukin-8 precursor                                                        |
| Ssc.10025.3.S1_at   | -7.30   | 0.00417 | CEBPD  | CCAAT/enhancer binding protein delta                                           |
| Ssc.16039.1.S1_at   | -7.49   | 0.00433 | RGS1   | Regulator of G-protein signaling 1                                             |
| Ssc.21805.1.S1_at   | -7.50   | 0.00001 | C4BPB  | C4b-binding protein beta chain precursor                                       |
| Ssc.9938.1.A1_at    | -7.74   | 0.00519 | GPR120 | G protein-coupled receptor 120 [Homo sapiens]                                  |
| Ssc.23500.1.S1_s_at | -8.16   | 0.00000 | SFTPD  | Pulmonary surfactant-associated protein D precursor                            |
| Ssc.14444.3.A1_a_at | -8.36   | 0.00136 | ARG2   | Arginase II, mitochondrial precursor                                           |
| Ssc.1121.1.S1_at    | -8.57   | 0.00404 | PDK4   | [Pyruvate dehydrogenase [lipoamide]] kinase isozyme 4, mitochondrial precursor |
| Ssc.11784.1.S1_at   | -8.77   | 0.00266 | TIMP1  | Metalloproteinase inhibitor 1 precursor                                        |
| Ssc.5545.1.S1_at    | -8.77   | 0.00122 | ATP10B | Potential phospholipid-transporting ATPase VB                                  |
| Ssc.19365.1.S1_at   | -9.01   | 0.00006 | FAM26F | PREDICTED: similar to gene; RIKEN cDNA 2810048G17                              |
| Ssc.29054.2.S1_at   | -9.21   | 0.00050 | GBP1   | Interferon-induced guanylate-binding protein 1                                 |
| Ssc.16470.2.A1_at   | -9.25   | 0.00015 | REG3A  | Pancreatitis-associated protein 1 precursor                                    |
| Ssc.18766.1.S1_at   | -9.90   | 0.00129 | OLFM4  | olfactomedin 4 precursor [Homo sapiens]                                        |
| Ssc.719.1.S1_at     | -10.36  | 0.00874 | CXCL6  | Small inducible cytokine B6 precursor                                          |
| Ssc.823.1.A1_at     | -10.52  | 0.00066 | 0      | 57 kDa protein                                                                 |
| Ssc.7864.1.A1_at    | -10.60  | 0.00273 | IL1RAP | Interleukin-1 receptor accessory protein precursor                             |
| Ssc.5333.1.S1_at    | -10.80  | 0.00207 | TSPAN1 | Tetraspanin 1                                                                  |
| Ssc.17026.1.S1_at   | -11.20  | 0.00145 | C4A    | Complement C4 precursor [Contains: C4a anaphylatoxin]                          |
| Ssc.29329.1.A1_at   | -11.33  | 0.00860 | DCHS2  | dachsous 2 isoform 1 [Homo sapiens]                                            |
| Ssc.30077.1.A1_at   | -11.62  | 0.00474 | WDR64  |                                                                                |
| Ssc.719.1.S1_a_at   | -11.97  | 0.00722 | CXCL6  | Small inducible cytokine B6 precursor                                          |
| Ssc.26345.1.S1_at   | -12.04  | 0.00369 | F13A1  | Coagulation factor XIII A chain precursor                                      |
| Ssc.670.1.S1_at     | -14.67  | 0.00019 | LYZ    | Lysozyme C precursor                                                           |
| Ssc.17337.1.S1_at   | -16.10  | 0.00000 | TLR2   | Toll-like receptor 2 precursor                                                 |
| Ssc.21108.1.S1_at   | -18.32  | 0.00009 | C5     | Complement C5 precursor [Contains: C5a anaphylatoxin]                          |
| Ssc.19393.1.S1_at   | -18.36  | 0.00000 | DMBT1  | deleted in malignant brain tumors 1 isoform b precursor [Homo sapiens]         |
| Ssc.1137.1.S1_at    | -18.84  | 0.00555 | CLYBL  | citrate lyase beta like [Homo sapiens]                                         |
| Ssc.18918.1.A1_at   | -19.12  | 0.00641 | GPX2   | Glutathione peroxidase-gastrointestinal                                        |
| Ssc.11048.1.S1_at   | -20.67  | 0.00412 | PLAC8  | Placenta-specific gene 8 protein                                               |
| Ssc.27786.1.S1_at   | -21.86  | 0.00124 | PFKFB3 | 6-phosphofructo-2-kinase/fructose-2,6-biphosphatase 3                          |
| Ssc.26009.1.S1_at   | -26.53  | 0.00001 | HLCS   | Biotin--protein ligase                                                         |
| Ssc.319.1.S1_at     | -26.85  | 0.00002 | SFTPD  | Pulmonary surfactant-associated protein D precursor                            |
| Ssc.670.2.S1_at     | -29.79  | 0.00078 | LYZ    | Lysozyme C precursor                                                           |
| Ssc.5053.1.S1_at    | -32.05  | 0.00020 | CD163  | CD163 antigen isoform a [Homo sapiens]                                         |
| Ssc.29054.1.A1_at   | -35.09  | 0.00000 | GBP1   | Interferon-induced guanylate-binding protein 1                                 |
| Ssc.24282.1.S1_at   | -35.96  | 0.00167 | CXCL2  | Macrophage inflammatory protein-2-alpha precursor                              |
| Ssc.883.1.S1_a_at   | -38.33  | 0.00010 | GBP2   | Interferon-induced guanylate-binding protein 2                                 |
| Ssc.311.1.S1_at     | -49.75  | 0.00005 | PI3    | Elafin precursor                                                               |
| Ssc.19692.1.S1_at   | -50.78  | 0.00066 | CXCL2  | Macrophage inflammatory protein-2-alpha precursor                              |
| Ssc.21582.1.S1_at   | -54.02  | 0.00115 | UBD    | Gamma-aminobutyric acid type B receptor, subunit 1 precursor                   |
| Ssc.29054.3.S1_at   | -73.15  | 0.00000 | GBP1   | Interferon-induced guanylate-binding protein 1                                 |
| Ssc.15989.1.S1_at   | -82.65  | 0.00001 | PI3    | Elafin precursor                                                               |
| Ssc.17889.1.A1_at   | -135.23 | 0.00001 | GBP2   | Interferon-induced guanylate-binding protein 2                                 |
| Ssc.2381.1.A1_at    | -141.66 | 0.00004 | S100A9 | Calgranulin B                                                                  |
| Ssc.16470.1.S1_a_at | -644.98 | 0.00017 | REG3A  | Pancreatitis-associated protein 1 precursor                                    |
